# Supplementary material for: Per- and Polyfluoroalkyl Substances in Canadian Fast Food Packaging
Source: PubMed Central journal article supplement — Environ Sci Technol Lett. 2023 Mar 28;10(4):343–9. doi: 10.1021/acs.estlett.2c00926 (PMC10637757; doi:10.1021/acs.estlett.2c00926), 2023-03-28
Supplement: ez2c00926_si_001.pdf [file ez2c00926_si_001.pdf]

**Supporting Information**  
**For**  
**Per- and Polyfluoroalkyl Substances in Canadian Fast Food**  
**Packaging**

Heather Schwartz-Narbonne<sup>1#</sup>, Chunjie Xia<sup>2#</sup>, Anna Shalin<sup>1</sup>, Heather D. Whitehead<sup>3</sup>,  
Diwen Yang<sup>1,4</sup>, Graham F. Peaslee<sup>5</sup>, Zhanyun Wang<sup>6,7</sup>, Yan Wu<sup>2 ‡</sup>, Hui Peng<sup>4,8</sup>, Arlene Blum<sup>9</sup>,  
Marta Venier<sup>2,\*</sup>, Miriam L. Diamond<sup>1,8,\*</sup>

1 Department of Earth Sciences, University of Toronto, Toronto, ON, M5S 3B1, Canada

2 O'Neill School of Public and Environmental Affairs, Indiana University, Bloomington, IN, 47405, United States

3 Department of Chemistry and Biochemistry, University of Notre Dame, Notre Dame, IN 46556, USA

4 Department of Chemistry, University of Toronto, Toronto, ON, M5S 3H6, Canada

5 Department of Physics and Astronomy, University of Notre Dame, Notre Dame, IN 46556

6 Institute of Environmental Engineering, ETH Zürich, 8093 Zürich, Switzerland

7 Empa – Swiss Federal Laboratories for Materials Science and Technology, Technology and Society Laboratory, CH-9014 St. Gallen, Switzerland

8 School of the Environment, University of Toronto, Toronto, ON, M5S 3E8, Canada

9 Green Science Policy Institute, Berkeley, CA 94709, USA

# Heather Schwartz-Narbonne and Chunjie Xia are co-first authors.

\*Co-Corresponding authors:

Miriam L. Diamond, e-mail: [miriam.diamond@utoronto.ca](mailto:miriam.diamond@utoronto.ca)

Marta Venier, email: [mvenier@indiana.edu](mailto:mvenier@indiana.edu)

**Current addresses:**

‡ Key Laboratory of Geographic Information Science (Ministry of Education), School of Geographic Sciences, East China Normal University, Shanghai 200241, China

Pages: 45

Tables: 13

Figures: 11

## Contents

|                                                                                                                                                        |    |
|--------------------------------------------------------------------------------------------------------------------------------------------------------|----|
| Section S1. Product Sampling.....                                                                                                                      | 3  |
| Section S2. PIGE Analysis. ....                                                                                                                        | 4  |
| Section S3. Sample Preparation and Instrumental Analysis for Targeted Analysis. ....                                                                   | 4  |
| Section S4. Sample Preparation and Instrumental Analysis for Hydrolysis.....                                                                           | 5  |
| Section S5. Sample Preparation and Instrumental Analysis for Non-targeted Analysis. ....                                                               | 5  |
| Section S6. PIGE Comparison Summary. ....                                                                                                              | 7  |
| Section S7. Discussion of Non-Targeted Analysis. ....                                                                                                  | 7  |
| Section S8. Discussion of Canadian Food Packaging Regulations and Example Probable Daily Intake Calculation. ....                                      | 8  |
| Section S9. Calculation of total F concentration ( $\mu\text{g F/m}^2$ ) from PFAS concentration (ng/g) analyzed by targeted analysis in products..... | 9  |
| Tables.....                                                                                                                                            | 10 |
| Figures.....                                                                                                                                           | 31 |
| References.....                                                                                                                                        | 43 |

This supporting information provides text, figures, and tables addressing

- (1) Product Sampling,
- (2) PIGE Analysis,
- (3) Sample Preparation and Instrumental Analysis for Targeted Analysis,
- (4) Sample Preparation and Instrumental Analysis for Non-targeted Analysis,
- (5) PIGE Comparison Summary,
- (6) Non-Targeted Analysis Discussion
- (7) Discussion of Canadian Food Packaging Regulations and Example Probable Daily Intake Calculation
- (8) Calculation of total F concentration ( $\mu\text{g F/m}^2$ ) from PFAS concentration (ng/g) analyzed by targeted analysis in products
- (9) Summary of previous studies of fast food packaging using PIGE spectroscopy,
- (10) Summary of targeted PFAS measured in fast food packaging in previous studies,
- (11) Sample type and descriptions. Specific sample numbers are provided for all samples which underwent targeted and non-targeted analyses,
- (12) List of analytes included in targeted analysis for LC-MS/MS and GC-MS along with their Limits of Detection (LODs),
- (13) List of targeted PFAS measured by LC-MS/MS,
- (14) List of targeted PFAS measured by GC-MS,
- (15) Surrogate (SS) and internal (IS) standards used to calculate PFAS concentrations,
- (16) Summary of duplicate samples measured by PIGE spectroscopy,
- (17) Replicate values for the targeted analysis of a field duplicate sample,
- (18) Summary of total F in all food packaging samples, determined by PIGE,
- (19) List of fast food packaging with total fluorine > 170 ppm,

- (20) Full results for all samples selected for targeted analysis using LC-MS/MS and GC-MS,
- (21) Summary of 22 PFAS tentatively identified using non-target analysis,
- (22) Chromatograms for the  $[M-H]^-$  ion of each PFCA standard used to for nontarget analysis QA/QC testing,
- (23) Spike and recovery values for PFCA compounds from PFBA – PFTeDA in three representative sample types,
- (24) Histogram of screening data showing total F in fast food packaging samples analyzed using PIGE,
- (25) Boxplots showing total F concentration in food packaging,
- (26) Stacked bar chart illustrating the PFAS composition of nine samples selected for targeted analysis,
- (27) Extracted ion chromatograms and a representative mass spectrum for compound group A, 6:2 FTUCA,
- (28) Extracted ion chromatograms and a representative mass spectrum for compound group B, n:3 fluorotelomer carboxylic acids,
- (29) Extracted ion chromatograms and a mass spectrum for compound group C, multiple H-substituted-ether-substituted-polyfluoroalkyl (linear) carboxylic acids,
- (30) Extracted ion chromatograms and a representative mass spectrum for compound group D, double bond perfluoroalkyl (linear) carboxylic acids,
- (31) Extracted ion chromatograms and a mass spectrum for compound group E, H-substituted perfluoroalkyl (linear) carboxylic acids, and
- (32) Extracted ion chromatograms and a representative mass spectrum for compound group F, perfluoroalkyl (linear) dicarboxylic acids.

## **Section S1. Product Sampling.**

Tables S3 and S4 describe the food packaging items sampled. All samples collected during sampling round 1 (February to March 2020) were measured using only particle-induced gamma ray emission (PIGE) spectroscopy. All samples collected during sampling round 2 (August 2020) were measured using PIGE, targeted LC-MS/MS, targeted GC-MS, and non-target LC-MS.

At each retailer, clean packaging un-soiled by food was collected with minimal touching and promptly sealed in an individual zip-lock plastic bag to avoid cross-sample contamination. For quality control, duplicate contact materials were collected for every 10th item - yielding 10 field duplicates total.

In the lab, each sample was prepared donning clean disposable gloves on a clean PFAS-free aluminum foil work surface, after wiping down all used surfaces and tools with isopropyl alcohol. Materials that contained food residue were gently rinsed first with reverse osmosis (RO) water. The packaging was measured for thickness using an electric caliper before being cut into 2 x 2 cm<sup>2</sup> coupons using an aluminum size template to minimize touching the sample.

Lab blanks were prepared for every 10<sup>th</sup> sample from a 2 x 2 cm<sup>2</sup> sample of clean Kimwipe. Field blanks were identical samples collected from retailers at the same time. For quality control, a lab duplicate sample was prepared for every 10<sup>th</sup> sample prepared – yielding 5 in total. Each sample and lab blank was sealed into individual Ziplock bags and shipped to the University of

Notre Dame for analysis via PIGE, or Indiana University for analysis via targeted GC-MS and LC-MS/MS. Samples were prepared via the same method for non-targeted LC-MS analysis at the University of Toronto.

## **Section S2. PIGE Analysis.**

For quality assurance/quality control (QA/QC) of sample variation, sample preparation, and analysis techniques, field duplicates and lab duplicates were analyzed blind to the analyst. In addition, reproducibility was tested by reanalyzing 5% of samples 2 to 5 times.

In general, PIGE involves irradiating each sample over 3 minutes using an ion beam of 10 nA of 3.4 MeV protons. This irradiation causes identifiable  $\gamma$ -rays to emit from the sample due to the de-excitation of  $^{19}\text{F}$  at 110 and 197 keV allowing for the counting of background-subtraction integrations. These summed  $\gamma$ -rays can then be converted to total F concentrations, as expressed in ppm F, by generating calibration curves using inorganic F standards, for which we can relate concentration of F to the PIGE counts. Because PIGE irradiated photons are limited to reaching 220  $\mu\text{m}$  depths into solids, varying sample thickness can lead to varying fluorine signal response. To account for varying thickness in fast food packaging samples, quantification of total fluorine was performed using sample thickness to perform thickness-dependent quantification. This approach was previously detailed in Xia *et al.* (2022).<sup>1</sup> In this work textiles of various thickness were spiked with solutions of inorganic fluoride to generate calibration curves for each textile. The slope measured from each calibration curve was plotted against textile thickness to relate sample thickness to signal response, allowing for application to samples with known thickness. For samples above the penetration depth of 220  $\mu\text{m}$  it is necessary to test both sides of thicker samples to measure fluorine content on each side of the material (taking the higher F side to represent the packaging subsampled from).

Four samples were chosen as field duplicates. Five samples were chosen as lab duplicates, and duplicate samples were collected from the same item. Nine samples were collected twice, once during each of the two sampling periods. Table S9 summarises the results of these tests. Five Kimwipe blank samples were collected and measured, all of which were below the detection limit for the method. These blanks were used in the formation of the calibration curve for the samples.

## **Section S3. Sample Preparation and Instrumental Analysis for Targeted Analysis.**

Tables S5-S8 summarize all compounds analyzed during targeted analysis, including their molecular weights, formulas, retention times, precursor and product ions (LC-MS/MS), and qualifier and quantifier ions (GC-MS). Additional instrumental parameters can be found in previous studies.<sup>2,3</sup> In brief, each sample was spiked with 20 ng each of surrogate standard and extracted first with 3 mL of 4:1 hexane/isopropanol twice and then with 3 mL of 1:1 methanol/acetonitrile twice. Each extraction step was performed using sonication for 30 min followed by centrifugation at 3000 rpm for 5 min. The supernatants were combined and reduced

to ~5 mL under nitrogen. 100 mg of Envi-Carb was added to the extract for clean-up, and the mixture was vortexed for 1 min and centrifuged for 5 min. The resulting sample was reduced to 500  $\mu$ L under nitrogen, and then filtered using a centrifuge filter. The filtrate was transferred into a 1-mL polypropylene vial and spiked with 50 ng each of the internal standards used for quantitation. LC-MS/MS analysis was done using an ultrahigh performance LC coupled with a triple-quadrupole MS (Agilent 1290 Infinity II UPLC-6470 QQQ-MS) in negative electro-spray ionization mode. GC-MS analysis was performed on an Agilent 7890 GC-5977B PCI-MS operated in the positive chemical ionization mode. For extracts of the five samples from the hydrolysis assay, only neutral PFAS were measured.

A procedural blank and a matrix spike sample were processed along with each batch sample to evaluate possible contamination from laboratory operations and the performance of the method. The recoveries of surrogate standards were in the range of 60–130%. Samples were corrected for recovery using the appropriate surrogate standards. After this correction, matrix spike recoveries of individual analytes were all within 80%–115%. Additionally, the data were blank corrected by subtracting the corresponding average solvent blank on a mass basis. The LODs were defined as the average solvent blank + 3  $\times$  standard deviation ( $n = 5$ ) or the amount of chemical generating a signal-to-noise of 5 if the compound was not detected in the solvent blanks. In addition, five Kimwipe field blanks were analyzed, and all the results were below the corresponding LODs. In the present study, one sample, a plastic-lined paper popcorn bag, was chosen as a field duplicate (see Table S8). Only compounds which were measured above the LOD are reported.

#### **Section S4. Sample Preparation and Instrumental Analysis for Hydrolysis.**

In brief, 1 mL 1 mol/L NaOH solution in methanol/water (90:10) was added to a 15 mL glass vial containing ~30 mg small pieces of samples, and then spiked with 40 ng each of the surrogate standards. The vial was vortexed for 1 min and placed in an oven at 60  $^{\circ}$ C for 16h. After the vial was cooled to room temperature, the remaining solution was transferred to a clean polypropylene (PP) vial, and 0.6 mL of a mixture of methyl tert-butyl ether/n-hexane (1:1, v/v) and 2 mL of LC/MS grade water were added. Samples were shaken for 30 minutes, and the organic (bottom) layer was transferred to a new clean PP vial with a glass pipette. Anhydrous Na<sub>2</sub>SO<sub>4</sub> was added to remove the water in the sample until the organic layer became clear. The extracts were transferred to a plastic Eppendorf vial with 50 mg anhydrous Na<sub>2</sub>SO<sub>4</sub>, and left to dry for 1 h with occasional shaking. Finally, the extracts were transferred into a 1-mL PP vial, spiked with 100 ng of internal standards and analyzed using GC/MS for targeted analysis of FTOHs and fluorotelomer (meth)acrylates (FT(M)Acs) as described in Section S3.

#### **Section S5. Sample Preparation and Instrumental Analysis for Non-targeted Analysis.**

Each sample was placed in a 15 mL PP tube with 10 mL HPLC-grade methanol. A procedure blank was prepared by using an empty PP tube without sample. The mixtures were shaken vigorously for 1 h, sonicated at 40  $^{\circ}$ C for 2 h, and centrifuged at 4000 g for 10 min. The extracts were decanted into 15 mL PP tubes, evaporated under N<sub>2</sub>, and reconstituted in 200  $\mu$ L of HPLC-grade methanol. Finally, the extract was filtered through an Acrodisc GHP Syringe Filter (pore

size 0.2  $\mu\text{m}$ ) before LC-MS analysis. For recovery calculations, three representative material types were chosen: a paper bag, a plastic-lined paper bag, and a molded fiber bowl. These samples were placed in a 15 mL PP tube and spiked with 20 ng each of PFCA compounds ranging from PFBA-PFTeDA. The tubes were then sealed and stored at room temperature in the dark for 24 hours, before being extracted as described above, for a final theoretical concentration of 100  $\mu\text{g/L}$ . Each spike was performed three times, and the average value is reported. Procedure blanks were obtained by running solvent through the entire extraction and analysis process.

PFAS analysis followed the protocol described in a previous study.<sup>4</sup> All food packaging samples were analyzed using a Q Exactive mass spectrometer equipped with a Vanquish UHPLC system (Thermo Fisher Scientific, USA). Mobile phase A was 2 mM ammonium acetate in ultrapure water and B was HPLC grade methanol. The injection volume was 2  $\mu\text{L}$ , and the PFAS were separated by a Hypersil Gold C18 column (100  $\times$  2.1 mm, 3  $\mu\text{m}$ , Thermo Scientific). The temperature of the column chamber was set to 40  $^{\circ}\text{C}$ , and the sampler chamber was 4  $^{\circ}\text{C}$ . The initial HPLC gradient was 10% B which was increased to 100% over 7 min, and was held static for 4.5 min. Then the gradient of B was decreased to 10% and held for 1 min to equilibrate. The flow rate of mobile phases was 0.3 mL/min. Data were acquired in full MS and data-independent acquisition (DIA) modes. The parameters of mass spectrometry were one full MS<sup>1</sup> scan (150-1000  $m/z$ ) switch mode recorded at resolution  $R = 70,000$  (at  $m/z$  200) with a maximum of  $3 \times 10^6$  ions, which were collected within 100 ms. The full MS<sup>1</sup> scan was followed by DIA MS<sup>2</sup> scans (150-450, 450-750  $m/z$ ) recorded at resolution  $R = 35,000$  (at  $m/z$  200), with a maximum of  $1 \times 10^5$  ions, which were collected within 60 ms. DIA data were acquired by using 10  $m/z$  isolation windows per MS<sup>2</sup> scan. Therefore, in total, there were thirty 10-  $m/z$  wide windows between 150-450 and 450-750  $m/z$ . The mass spectrometry was conducted in negative electrospray ionization mode, with spray voltage of 3kV, sheath gas flow rate of 30 L/h, auxiliary gas flow rate of 6 L/h, and capillary temperature of 300  $^{\circ}\text{C}$ .

All nontarget data analyses were accomplished with an in-house R script. Raw MS files were converted to mzXML format using MSconvert (ProteoWizard). The peaks were detected with the 'XCMS' R package<sup>5</sup> at a mass tolerance of 2.5 ppm. The peak features were matched across samples with a mass tolerance of 2.5 ppm and retention time window of 20 seconds after retention time adjustment. Only the features detected with intensities 3 times higher than those in procedure plan were kept for subsequent data analysis. The differentiated features were searched against 1,763 PFAS curated by Liu et al.<sup>6</sup> with a mass tolerance of 3 ppm. 89 PFAS were initially detected by exact mass matching. To further exclude false identifications, we manually interpreted the MS<sup>2</sup> spectra of each PFAS. Only 10 PFAS with characteristic fragments detected from MS<sup>2</sup> spectra were considered as reliable identifications, and their confidence levels were assigned according to the Schymanski et al. scale.<sup>7</sup> For confidence level 1, the identity was confirmed via authentic standard. For level 2, the structures were supported by diagnostic fragments, e.g.,  $[\text{M}-4\text{HF}-\text{CO}_2-\text{H}]^-$  and  $[\text{M}-3\text{HF}-\text{CO}_2-\text{H}]^-$  for fluorotelomer carboxylic acids (FTCAs). For level 3, the structures were supported by MS<sup>2</sup> spectra with less informative fragments, e.g.,  $[\text{C}_n\text{F}_{2n+1}]^-$  for H-substituted polyfluoroalkyl (linear) carboxylic acids, or by literature references in which the compound was assigned a confidence level of 3.

Potential homologue series of PFAS were further searched in MS<sup>1</sup> within a mass tolerance of 3 ppm by differentiating  $(\text{CF}_2)_n$  for those PFAS beyond the current database. Retention times of compounds within these homologue series were used as part of the confirmation of their

identities. For example, shorter-chain compounds within a series should have correspondingly shorter retention times. The identities of all PFAS and their confidence levels are provided in Table S14.

For NTA data analysis, chromatograms for each of the PFCA standards used for spike and recovery analysis and method optimization are displayed in Figure S1, alongside the relative intensity of each compound at 100 ppb.

Figure S2 shows spike and recovery values for PFCA standards ranging from PFBA - PFTeDA. The recoveries for each compound ranged from 82% - 176% after blank subtraction. Recoveries appeared to be material specific, with the molded fiber bowl having the lowest average recovery values and the plastic-lined paper bag having the highest. As the primary aim of nontargeted analysis is to detect unknown PFAS beyond targeted analysis, rather than quantitative measurement, sample cleanup was not performed to reduce the loss of compounds. The current recoveries without significant matrix suppression effects are acceptable. A spiked solvent sample which was put through the extraction process showed that no loss of compounds occurred during the extraction procedure.

## Section S6. PIGE Comparison Summary.

Schultes et al. measured between 391 and 4088 ppm F in three French fry packages.<sup>8</sup> Robel et al. measured total F ranging from below the LOD to 430 nmol F/cm<sup>2</sup> for 5 fast food packaging.<sup>9</sup> The total F was above the LOD for 3/5 samples.<sup>9</sup> Ritter et al. measured total F in 25 fast food packaging.<sup>10</sup> 13 of the samples had total F below the LOD, while the remaining 12 contained between 57-331 nmol F/cm<sup>2</sup>.<sup>10</sup> In a widescale study of fast-food paper and paperboard food contact packaging collected from multiple brands across the United States, Schaidler et al. detected F > 16 nmol of F/cm<sup>2</sup> in 40% of 328 samples.<sup>11</sup> This slightly lower rate of detection versus our finding of 45% is in line with differences in sampling methods between the Schaidler et al. study and ours. Schaidler et al. aimed to represent a broad distribution of packaging types and geographic locations, whereas our study aimed to conduct in depth analyses on a smaller number of high-F samples.

## Section S7. Discussion of Non-Targeted Analysis.

**Group A.** Several diagnostic fragments of 6:2 FTUCA were observed, including [M-HF-CO<sub>2</sub>-H]<sup>-</sup> and [M-CH<sub>2</sub>-HF-CO<sub>2</sub>-H]<sup>-</sup>, consistent with previous studies on MS<sup>2</sup> fragmentation of 6:2 FTUCA.<sup>12</sup> This identification was further confirmed by comparing retention time and MS<sup>2</sup> spectra with those obtained using a commercially available standard (Figure S7, Table S14). The compound was detected in all molded fiber bowl samples, despite coming from different retailers.

**Group B.** Both 5:3 FTCA and 6:3 FTCA were supported by the presence of multiple diagnostic fragments (Figure S8, Table S14). The fragmentation pattern for this group was consistent with previous studies (e.g., [M-C<sub>2</sub>H<sub>4</sub>-CO<sub>2</sub>-H]<sup>-</sup> at *m/z* 318.9797), which allowed for localization of the H-substitutions.<sup>9,11,13</sup>

**Group C.** The MS<sup>2</sup> spectra clearly demonstrated the presence of ether bond ([M-2HF-OCH<sub>2</sub>-CO<sub>2</sub>-H]<sup>-</sup>) and hydrocarbons ([M-4HF-CO<sub>2</sub>-H]<sup>-</sup>) (Figure S9, Table S14).<sup>14</sup> It was not possible to determine the exact location of the hydrogen substitutions.

**Group D.** The fragments available in the MS<sup>2</sup> spectra for the compounds were [M-CO<sub>2</sub>-H]<sup>-</sup>, and [C<sub>n</sub>F<sub>2n+1</sub>]<sup>-</sup> (Figure S10, Table S14). These match fragments found in the literature but are not characteristic for identification of the location of the double bond.<sup>14,15</sup>

**Group E.** The fragments available in the MS<sup>2</sup> for the n=9, 11, 12, and 13 compounds were [M-HF-CO<sub>2</sub>-H]<sup>-</sup> and [C<sub>n</sub>F<sub>2n+1</sub>]<sup>-</sup> (Figure S11, Table S14). They matched the fragments listed in the literature, but it was not possible to locate the H-substitution beyond determining that it was not on the terminal three carbons.<sup>12,14,16,17</sup> The n=6, 8, and 10 compounds only had the [M-HF-CO<sub>2</sub>-H]<sup>-</sup> in the MS<sup>2</sup> spectra, meaning that it was also not possible to confirm the location of the H-substitution. The n=5 and 7 compounds did not have any identifying fragments due to their low abundances, but their identities were supported by their retention time order relative to other homologues.

**Group F.** In-source fragments for this compound were detected in the MS<sup>1</sup> spectrum (Figure S12, Table S14). In particular, we found [M-HF-2CO<sub>2</sub>-H]<sup>-</sup> in the MS<sup>1</sup> of all compounds in this group. The presence of two CO<sub>2</sub> neutral loss supported two carboxylates contained in these PFAS. The [M-HF-2CO<sub>2</sub>-H]<sup>-</sup> in source fragment was also detected for all compounds in this group except n=7. The n=10 compound had a C<sub>7</sub>F<sub>13</sub> fragment in the MS<sup>2</sup>, which matched that observed in the MS<sup>2</sup> of a standard in a previous publication.<sup>14</sup>

## **Section S8. Discussion of Canadian Food Packaging Regulations and Example Probable Daily Intake Calculation.**

The onus for ensuring the safety of food packaging in Canada lies with manufacturers, who can opt to seek a pre-market assessment by the Health Products and Food Branch of Health Canada, as described in Section B.23.001 of the Food and Drugs Act and Regulations (SI Section S7).<sup>18</sup> If a pre-market assessment for a new additive or single constituent used in food packaging is requested, Health Canada asks for information on the product identity, proposed usage, migration data (e.g., using a 10 or 95% ethanol extraction), and toxicological data.

The guidance does not specify whether this threshold is for a single or total PFAS; if it pertains to a single PFAS, this toxicological information is not required to account for possible addition/synergistic effects of multiple PFAS.<sup>19</sup> This method also cannot account for unknown chemicals and unintentionally added chemicals, which would not be detected by targeted analysis and could be of concern.<sup>19</sup> Further, the analytical method is not prescribed, i.e., the method may not include compounds identified here using targeted and non-targeted analysis.

If toxicological information must be supplied, such information is very limited for most compounds listed here, including the ubiquitous 6:2 FTOH which is both toxic and bioaccumulative.<sup>20-22</sup>



The probable daily intake threshold is defined as  $0.025 \mu\text{g kg bw}^{-1} \text{d}^{-1}$ .<sup>18</sup> Above, this, there are tiers of concern from “very low” at 0.025-0.1 to high at  $>25 \mu\text{g kg bw}^{-1} \text{d}^{-1}$ .

Targeted analysis detected between 1-1.6  $\mu\text{g/g}$  of total PFAS per molded (“compostable”) bowl, each of which weighed roughly 20 g. This means that each bowl contained roughly 20-32  $\mu\text{g}$  of total PFAS. Migration rates of PFAS from food packaging vary according to the type of food packaging, temperature, contact time, extraction process used and PFAS chain length, with higher migration rates for short-chain compounds, e.g., PFHxA, PFHpA.<sup>23</sup> For example, Yuan et al. saw migration efficiencies ranging from 0.004% - 18.1% for different PFAS from molded fiber bowls using a 10% ethanol solution.<sup>14</sup> However, migration rates can be up to 100% for short chained compounds using an acetic acid extraction.<sup>25</sup>

Assuming a low migration rate of 1% for all compounds results in an estimated daily intake of  $0.003\text{-}0.05 \mu\text{g kg bw}^{-1} \text{d}^{-1}$  for a molded fiber bowl, which ranges from below the threshold of concern to reach the very low concern level for the daily intake threshold set out by the Health Products and Food Branch of the Government of Canada. Assuming higher migration rates of 20-100% results in an estimated daily intake from  $0.067\text{-}0.53 \mu\text{g kg bw}^{-1} \text{d}^{-1}$ . The highest estimate is within the range of low concern ( $0.1\text{-}2.5 \mu\text{g kg bw}^{-1} \text{d}^{-1}$ ). For Probable Daily Intake values estimated according to regulations that exceed the very low and low threshold values, a submission to Health Canada must be accompanied by an estimate of toxicity from a QSAR (very low concern) to a short-term genotoxicity 28-day rodent feeding test (low concern).<sup>18</sup>

This type of reporting is likely for individual compounds (not the total PFAS), does not consider unexpected impurities and degradation products not traditionally measured by targeted analysis, and does not address the lack of toxicity data or vetted QSARs for many of the compounds reported in this study.

## **Section S9. Calculation of total F concentration ( $\mu\text{g F/m}^2$ ) from PFAS concentration (ng/g) analyzed by targeted analysis in products**

We used equation 1 to calculate the total F concentration in individual PFAS based on sample area for targeted analysis of extracts or after hydrolysis assay. We then summed all the total F concentrations of individual PFAS to get the total F concentration analyzed by targeted analysis of extracts or after hydrolysis assay in product. Equation 1 was used to convert between units of  $\mu\text{g F/m}^2$  and ng/g.

$$C_i (\mu\text{g F/m}^2) = \frac{C_i (\text{ng/g}) \times m (\text{g})}{A (\text{m}^2)} \times \frac{19 \times N_F}{M_w} \times 10^{-3} \quad (1)$$

where  $C_i$  ( $\mu\text{g F/m}^2$ ) is the concentration of total F in individual PFAS compound  $i$  based on area,  $C_i$  (ng/g) is the concentration of individual PFAS compound  $i$ ;  $m$  (g) is the mass of sample extracted for targeted analysis;  $A$  ( $\text{m}^2$ ) is the area of sample used for targeted analysis;  $M_w$  is the molecular weight of compound  $i$  (the atomic weight of F is 19 g/mol), g/mol;  $N_F$  is the number of F in compound  $i$ 's molecular formula; and  $10^{-3}$  is the unit conversion from ng to  $\mu\text{g}$ .

## Tables

**Table S1.** Summary of previous studies of fast food packaging using PIGE spectroscopy.

| Year                                | Sample Type                                                                                                             | Number of Samples           | Location of Samples                                                 | Results (% samples with high, low, no F)                                                                                                                                                                                                                                             |
|-------------------------------------|-------------------------------------------------------------------------------------------------------------------------|-----------------------------|---------------------------------------------------------------------|--------------------------------------------------------------------------------------------------------------------------------------------------------------------------------------------------------------------------------------------------------------------------------------|
| Schultes et al., 2019 <sup>8</sup>  | Paper bag, takeout cardboard container, microwave popcorn bags                                                          | N=9                         | Sweden                                                              | All 8 samples showed F hits, consistent across all 3 methods used to detect total fluorine.                                                                                                                                                                                          |
| Schaider et al., 2017 <sup>11</sup> | Food contact paper, noncontact paper, food contact paperboard, paper cups, other beverages, miscellaneous               | N=407                       | US (Washington, Massachusetts, Michigan, California, Washington DC) | Of the 407 samples, 33% had detectable total F concentrations. 46% of food contact papers and 20% of paperboard samples had detectable fluorine.                                                                                                                                     |
| Robel et al., 2017 <sup>9</sup>     | Fast food packaging, popcorn bags                                                                                       | N=6 food contact materials  | Washington, US                                                      | 4/6 food contact materials had total F above LOD                                                                                                                                                                                                                                     |
| Ritter et al., 2017 <sup>10</sup>   | Wrappers for tacos, pizza, burgers, sandwiches. Paperboard from fast-food fries, chicken, drink cups, etc. Popcorn bags | N=50 food contact materials | Washington, US                                                      | 8 of the food contact paper samples showed <LOQ, 10 of food contact papers ranged from 57-331 nmol F/cm <sup>2</sup> . Paperboard food-contact items and popcorn bags also showed hits ranging from 42-285 nmol F/cm <sup>2</sup> and 161-445 nmol F/cm <sup>2</sup> , respectively. |

**Table S2.** Summary of targeted PFAS measured in fast food packaging in previous studies.  
Please see additional excel file.

**Table S3.** Sample type and descriptions. Specific sample numbers are provided for all samples which underwent targeted and non-targeted analyses. Sampling round one refers to samples collected between February to March 2020, and round two refers to samples collected in August 2020.

| <b>Sample Type</b> | <b>Description</b>        | <b>Sampling Round</b> |
|--------------------|---------------------------|-----------------------|
| Burger             | Paper wrapper             | 1                     |
| Sub sandwich       | Paper wrapper             | 1                     |
| Burrito roll       | Paper wrapper             | 1                     |
| Donut              | Paper bag                 | 1                     |
| Burger             | Paper wrapper             | 1                     |
| Pastry             | Paper bag                 | 1                     |
| Pastry             | Paper bag                 | 1                     |
| Burger             | Paper bag                 | 1                     |
| Burger             | Paper wrapper             | 1                     |
| Burrito bowl 1     | Molded fiber bowl         | 1, 2                  |
| Popcorn bag 7      | Paper bag                 | 1, 2                  |
| Popcorn bag 8      | Paper bag, plastic lining | 1, 2                  |
| Pastry bag 5       | Paper bag                 | 1, 2                  |
| Pita wrap          | Paper wrapper             | 1                     |
| Pita wrap          | Paper wrapper             | 1                     |
| Sandwich           | Paper wrapper             | 1                     |
| Burger             | Paper wrapper             | 1                     |
| Burger             | Paper wrapper             | 1                     |
| Burger             | Paper wrapper             | 1                     |
| Sandwich           | Paper wrapper             | 1                     |
| Bagel              | Paper bag                 | 1                     |
| Sub sandwich       | Paper wrapper             | 1                     |

|                |                   |      |
|----------------|-------------------|------|
| Sub sandwich   | Paper wrapper     | 1    |
| Donut bag      | Paper bag         | 1    |
| Sandwich       | Paper wrapper     | 1    |
| Salad bowl 3   | Molded fiber bowl | 1, 2 |
| Pita wrap      | Paper wrapper     | 1    |
| Pita wrap      | Paper wrapper     | 1    |
| Burger         | Paper wrapper     | 1    |
| Burrito roll   | Paper wrapper     | 1    |
| Sub sandwich   | Paper wrapper     | 1    |
| Donut bag 4    | Paper bag         | 1, 2 |
| Burger         | Paper wrapper     | 1    |
| Pastry         | Paper bag         | 1    |
| Pastry         | Paper bag         | 1    |
| Burrito bowl 2 | Molded fiber bowl | 1, 2 |
| Sandwich       | Paper wrapper     | 1    |
| Sandwich       | Paper bag         | 1    |
| Salad          | Molded fiber bowl | 1    |
| Burrito roll   | Paper wrapper     | 1,2  |
| Pastry 6       | Paper bag         | 1    |
| Pastry         | Paper bag         | 1    |

**Table S4.** List of analytes included in targeted analysis for LC-MS/MS and GC-MS along with their Limits of Detection (LODs). A description of the calculation of LODs is given above. The LODs ranged from 0.001 ng for pefluoropentanesulfonic acid (PFPeS) to 0.62 ng for Perfluoro-2-propoxypropanoic acid (GenX). <sup>3</sup> PFAS indicated in shaded area were analyzed by targeted and non-targeted analysis.

| LC-MS/MS |          |         |          |              |          | GC-MS         |          |           |          |
|----------|----------|---------|----------|--------------|----------|---------------|----------|-----------|----------|
| Analyte  | LOD (ng) | Analyte | LOD (ng) | Analyte      | LOD (ng) | Analyte       | LOD (ng) | Analyte   | LOD (ng) |
| PFPrA    | 0.008    | PFTeDA  | 0.007    | PFECHS       | 0.003    | FHxSA         | 0.003    | 4:2 FTOH  | 0.37     |
| PFBA     | 0.01     | PFHxDA  | 0.01     | Cl-PFOS      | 0.005    | FOSA          | 0.003    | 6:2 FTOH  | 0.22     |
| PFPeA    | 0.009    | GenX    | 0.62     | 6:2 FTCA     | 0.076    | MeFOSA        | 0.004    | 8:2 FTOH  | 0.16     |
| PFHxA    | 0.007    | PFPrS   | 0.007    | 8:2 FTCA     | 0.08     | EtFOSA        | 0.002    | 10:2 FTOH | 0.22     |
| PFHpA    | 0.005    | PFBS    | 0.001    | 10:2 FTCA    | 0.074    | 6:2 PAP       | 0.03     | MeFOSE    | 0.23     |
| PFOA     | 0.004    | PFPeS   | 0.001    | 4:2 FTSA     | 0.003    | 8:2 PAP       | 0.028    | EtFOSE    | 0.22     |
| PFNA     | 0.007    | PFHxS   | 0.002    | 6:2 FTSA     | 0.005    | 6:2 diPAP     | 0.002    | 6:2 FTAc  | 0.032    |
| PFDA     | 0.007    | PFHpS   | 0.005    | 8:2 FTSA     | 0.003    | 6:2/8:2 diPAP | 0.001    | 8:2 FTAc  | 0.039    |
| PFUnDA   | 0.006    | PFOS    | 0.005    | 6:2 Cl-PFESA | 0.002    | 8:2 diPAP     | 0.001    | 10:2 FTAc | 0.041    |
| PFDoDA   | 0.009    | PFNS    | 0.002    | 8:2 Cl-PFESA | 0.004    | 6:2 FTUCA     | 0.001    | 6:2 FTMAc | 0.031    |
| PFTTrDA  | 0.006    | PFDS    | 0.008    | FBSA         | 0.002    | 5:3 FTCA      | 0.001    | 8:2 FTMAc | 0.034    |

**Table S5.** List of targeted PFAS measured by LC-MS/MS.

| Abbr.  | Compound Name               | CAS #     | Formula                                         | Retention time (min) | Mol. Wt. | Precursor ion [M-H/D]- | Fragmentor (volts) | Product ions (m/z) | Collision energy (volts) | Structure                                            |
|--------|-----------------------------|-----------|-------------------------------------------------|----------------------|----------|------------------------|--------------------|--------------------|--------------------------|------------------------------------------------------|
| PFPrA  | Perfluoropropanoic acid     | 422-64-0  | C <sub>3</sub> HF <sub>5</sub> O <sub>2</sub>   | 0.532                | 164.03   | 162.9                  | 64                 | 119.0              | 5                        | F <sub>3</sub> CCF <sub>2</sub> COOH                 |
| PFBA   | Perfluorobutanoic acid      | 375-22-4  | C <sub>4</sub> HF <sub>7</sub> O <sub>2</sub>   | 2.243                | 214.04   | 213.0                  | 64                 | 169                | 5                        | F <sub>3</sub> C(CF <sub>2</sub> ) <sub>2</sub> COOH |
| PFPeA  | Perfluoropentanoic acid     | 2706-90-3 | C <sub>5</sub> HF <sub>9</sub> O <sub>2</sub>   | 3.518                | 264.05   | 263.0                  | 64                 | 218.9              | 5                        | F <sub>3</sub> C(CF <sub>2</sub> ) <sub>3</sub> COOH |
| PFHxA  | Perfluoro-n-hexanoic acid   | 307-24-4  | C <sub>6</sub> HF <sub>11</sub> O <sub>2</sub>  | 5.008                | 314.05   | 313.0                  | 73                 | 268.9              | 5                        | F <sub>3</sub> C(CF <sub>2</sub> ) <sub>4</sub> COOH |
| PFHpA  | Perfluoro-n-heptanoic acid  | 375-85-9  | C <sub>7</sub> HF <sub>13</sub> O <sub>2</sub>  | 6.646                | 364.06   | 363.0                  | 78                 | 319                | 5                        | F <sub>3</sub> C(CF <sub>2</sub> ) <sub>5</sub> COOH |
| PFOA   | Perfluoro-n-octanoic acid   | 335-67-1  | C <sub>8</sub> HF <sub>15</sub> O <sub>2</sub>  | 8.186                | 414.07   | 413.1                  | 83                 | 369                | 5                        | F <sub>3</sub> C(CF <sub>2</sub> ) <sub>6</sub> COOH |
| PFNA   | Perfluoro-n-nonanoic acid   | 375-95-1  | C <sub>9</sub> HF <sub>17</sub> O <sub>2</sub>  | 9.542                | 464.08   | 463.1                  | 83                 | 419                | 5                        | F <sub>3</sub> C(CF <sub>2</sub> ) <sub>7</sub> COOH |
| PFDA   | Perfluoro-n-decanoic acid   | 335-76-2  | C <sub>10</sub> HF <sub>19</sub> O <sub>2</sub> | 10.712               | 514.08   | 513.0                  | 93                 | 468.9              | 5                        | F <sub>3</sub> C(CF <sub>2</sub> ) <sub>8</sub> COOH |
| PFUnDA | Perfluoro-n-undecanoic acid | 2058-94-8 | C <sub>11</sub> HF <sub>21</sub> O <sub>2</sub> | 11.725               | 564.09   | 563.0                  | 102                | 518.9              | 5                        | F <sub>3</sub> C(CF <sub>2</sub> ) <sub>9</sub> COOH |

| Abbr.  | Compound Name                     | CAS #      | Formula                                         | Retention time (min) | Mol. Wt. | Precursor ion [M-H/D]- | Fragmentor (volts) | Product ions (m/z) | Collision energy (volts) | Structure                                                                |
|--------|-----------------------------------|------------|-------------------------------------------------|----------------------|----------|------------------------|--------------------|--------------------|--------------------------|--------------------------------------------------------------------------|
| PFDoDA | Perfluoro-n-dodecanoic acid       | 307-55-1   | C <sub>12</sub> HF <sub>23</sub> O <sub>2</sub> | 12.601               | 614.10   | 613.0                  | 102                | 569                | 9                        | F <sub>3</sub> C(CF <sub>2</sub> ) <sub>10</sub> COOH                    |
|        |                                   |            |                                                 |                      |          |                        |                    | 269                | 21                       |                                                                          |
| PFTrDA | Perfluoro-n-tridecanoic acid      | 72629-94-8 | C <sub>13</sub> HF <sub>25</sub> O <sub>2</sub> | 13.347               | 664.11   | 663.1                  | 107                | 619                | 9                        | F <sub>3</sub> C(CF <sub>2</sub> ) <sub>11</sub> COOH                    |
|        |                                   |            |                                                 |                      |          |                        |                    | 169                | 29                       |                                                                          |
| PFTeDA | Perfluoro-n-tetradecanoic acid    | 376-06-7   | C <sub>14</sub> HF <sub>27</sub> O <sub>2</sub> | 13.998               | 714.11   | 713.1                  | 112                | 668.9              | 13                       | F <sub>3</sub> C(CF <sub>2</sub> ) <sub>12</sub> COOH                    |
|        |                                   |            |                                                 |                      |          |                        |                    | 169                | 29                       |                                                                          |
| PFHxDA | Perfluoro-n-hexadecanoic acid     | 67905-19-5 | C <sub>16</sub> HF <sub>31</sub> O <sub>2</sub> | 15.041               | 814.13   | 813.1                  | 121                | 768.9              | 13                       | F <sub>3</sub> C(CF <sub>2</sub> ) <sub>14</sub> COOH                    |
|        |                                   |            |                                                 |                      |          |                        |                    | 168.9              | 37                       |                                                                          |
| Gen X  | Perfluoro-2-propoxypropanoic acid | 13252-13-6 | C <sub>6</sub> HF <sub>11</sub> O <sub>3</sub>  | 5.866                | 330.05   | 329.0                  | 156                | 284.9              | 5                        | F <sub>3</sub> C(CF <sub>2</sub> ) <sub>2</sub> OCF(COOH)CF <sub>3</sub> |
|        |                                   |            |                                                 |                      |          |                        |                    | 169.0              | 13                       |                                                                          |
| PFPrS  | Perfluoro-1-propanesulfonic acid  | 423-41-6   | C <sub>3</sub> HF <sub>7</sub> SO <sub>3</sub>  | 2.748                | 250.09   | 249.1                  | 140                | 80                 | 37                       | F <sub>3</sub> C(CF <sub>2</sub> ) <sub>2</sub> SO <sub>3</sub> H        |
|        |                                   |            |                                                 |                      |          |                        |                    | 98.9               | 33                       |                                                                          |
| PFBS   | Perfluoro-1-butanesulfonic acid   | 375-73-5   | C <sub>4</sub> HF <sub>9</sub> SO <sub>3</sub>  | 3.876                | 300.10   | 299.0                  | 149                | 80                 | 37                       | F <sub>3</sub> C(CF <sub>2</sub> ) <sub>3</sub> SO <sub>3</sub> H        |
|        |                                   |            |                                                 |                      |          |                        |                    | 98.9               | 37                       |                                                                          |
| PFPeS  | Perfluoro-1-pentanesulfonic acid  | 2706-91-4  | C <sub>5</sub> HF <sub>11</sub> SO <sub>3</sub> | 5.336                | 350.11   | 349.0                  | 175                | 80                 | 45                       | F <sub>3</sub> C(CF <sub>2</sub> ) <sub>4</sub> SO <sub>3</sub> H        |
|        |                                   |            |                                                 |                      |          |                        |                    | 98.9               | 37                       |                                                                          |
| PFHxS  | Perfluoro-1-hexanesulfonic acid   | 355-46-4   | C <sub>6</sub> HF <sub>13</sub> SO <sub>3</sub> | 6.885                | 400.11   | 399.0                  | 179                | 80                 | 45                       | F <sub>3</sub> C(CF <sub>2</sub> ) <sub>5</sub> SO <sub>3</sub> H        |
|        |                                   |            |                                                 |                      |          |                        |                    | 98.9               | 41                       |                                                                          |
| PFHpS  |                                   |            | C <sub>7</sub> HF <sub>15</sub> SO <sub>3</sub> | 8.357                | 450.12   | 449.0                  | 183                | 80                 | 49                       | F <sub>3</sub> C(CF <sub>2</sub> ) <sub>6</sub> SO <sub>3</sub> H        |



| Abbr.              | Compound Name                                       | CAS #       | Formula                                                         | Retention time (min) | Mol. Wt. | Precursor ion [M-H/D]- | Fragmentor (volts) | Product ions (m/z) | Collision energy (volts) | Structure                                                                                            |
|--------------------|-----------------------------------------------------|-------------|-----------------------------------------------------------------|----------------------|----------|------------------------|--------------------|--------------------|--------------------------|------------------------------------------------------------------------------------------------------|
|                    | Perfluoro-1-heptanesulfonic acid                    | 375-92-8    |                                                                 |                      |          |                        |                    | 98.9               | 45                       |                                                                                                      |
| PFOS               | Perfluoro-1-octanesulfonic acid                     | 1763-23-1   | C <sub>8</sub> HF <sub>17</sub> SO <sub>3</sub>                 | 9.647                | 500.13   | 499.0                  | 208                | 80<br>98.9         | 101<br>49                | F <sub>3</sub> C(CF <sub>2</sub> ) <sub>7</sub> SO <sub>3</sub> H                                    |
| PFNS               | Perfluoro-1-nonanesulfonic acid                     | 68259-12-1  | C <sub>9</sub> HF <sub>19</sub> SO <sub>3</sub>                 | 10.776               | 549.93   | 549.0                  | 218                | 80<br>98.9         | 105<br>49                | F <sub>3</sub> C(CF <sub>2</sub> ) <sub>8</sub> SO <sub>3</sub> H                                    |
| PFDS               | Perfluoro-1-decanesulfonic acid                     | 335-77-3    | C <sub>10</sub> HF <sub>21</sub> SO <sub>3</sub>                | 11.764               | 600.14   | 598.9                  | 232                | 80<br>98.9         | 137<br>53                | F <sub>3</sub> C(CF <sub>2</sub> ) <sub>9</sub> SO <sub>3</sub> H                                    |
| PFECHS             | Perfluoro-4-ethylcyclohexanesulfonic acid           | 646-83-3    | C <sub>8</sub> HF <sub>15</sub> SO <sub>3</sub>                 | 8.096                | 462.13   | 461.0                  | 150                | 380.9<br>98.9      | 29<br>29                 | F <sub>5</sub> C <sub>2</sub> (C <sub>6</sub> F <sub>10</sub> ) ( <i>para</i> -) SO <sub>3</sub> H   |
| Cl-PFOS            | 8-Chloroperfluoro-1-octanesulfonic acid             | 777011-38-8 | C <sub>8</sub> HF <sub>16</sub> ClSO <sub>3</sub>               | 9.897                | 516.58   | 515.0                  | 203                | 80<br>98.9         | 105<br>49                | ClF <sub>2</sub> C(CF <sub>2</sub> ) <sub>7</sub> SO <sub>3</sub> H                                  |
| 6:2 Cl-PFESA       | 9-Chlorohexadecafluoro-3-oxanonane-1-sulfonic acid  | 756426-58-1 | C <sub>8</sub> HCIF <sub>16</sub> O <sub>4</sub> S              | 9.379                | 532.58   | 530.9                  | 161                | 350.9<br>83.0      | 29<br>29                 | ClF <sub>2</sub> C(CF <sub>2</sub> ) <sub>5</sub> O(CF <sub>2</sub> ) <sub>2</sub> SO <sub>3</sub> H |
| 8:2 Cl-PFESA       | 11-Chloroeicosafluoro-3-oxaundecane-1-sulfonic acid | 763051-92-9 | C <sub>10</sub> HCIF <sub>20</sub> O <sub>4</sub> S             | 10.812               | 632.60   | 630.9                  | 171                | 450.9<br>83.0      | 33<br>33                 | ClF <sub>2</sub> C(CF <sub>2</sub> ) <sub>7</sub> O(CF <sub>2</sub> ) <sub>2</sub> SO <sub>3</sub> H |
| FBSA               | Perfluoro-1-butanesulfonamide                       | 30334-69-1  | C <sub>4</sub> H <sub>2</sub> F <sub>9</sub> NO <sub>2</sub> S  | 5.002                | 299.12   | 298.0                  | 98                 | 78.0<br>48.1       | 25<br>93                 | F <sub>3</sub> C(CF <sub>2</sub> ) <sub>3</sub> SO <sub>2</sub> NH <sub>2</sub>                      |
| FH <sub>x</sub> SA | Perfluoro-1-hexanesulfonamide                       | 41997-13-1  | C <sub>6</sub> H <sub>2</sub> F <sub>13</sub> NO <sub>2</sub> S | 8.226                | 399.13   | 397.9                  | 117                | 78.0<br>48.1       | 29<br>100                | F <sub>3</sub> C(CF <sub>2</sub> ) <sub>5</sub> SO <sub>2</sub> NH <sub>2</sub>                      |

| Abbr.     | Compound Name                                   | CAS #       | Formula                                                          | Retention time (min) | Mol. Wt. | Precursor ion [M-H/D]- | Fragmentor (volts) | Product ions (m/z) | Collision energy (volts) | Structure                                                                                         |
|-----------|-------------------------------------------------|-------------|------------------------------------------------------------------|----------------------|----------|------------------------|--------------------|--------------------|--------------------------|---------------------------------------------------------------------------------------------------|
| FOSA      | Perfluoro-1-octanesulfonamide                   | 754-91-6    | C <sub>8</sub> H <sub>2</sub> F <sub>17</sub> NO <sub>2</sub> S  | 11.159               | 499.14   | 498.0                  | 169                | 78<br>48.1         | 37<br>150                | F <sub>3</sub> C(CF <sub>2</sub> ) <sub>7</sub> SO <sub>2</sub> NH <sub>2</sub>                   |
| MeFOSA    | N-methylperfluoro-1-octanesulfonamide           | 31506-32-8  | C <sub>9</sub> H <sub>4</sub> F <sub>17</sub> NO <sub>2</sub> S  | 12.808               | 513.17   | 512.0                  | 160                | 169<br>218.9       | 29<br>25                 | F <sub>3</sub> C(CF <sub>2</sub> ) <sub>7</sub> SO <sub>2</sub> NHCH <sub>3</sub>                 |
| EtFOSA    | N-ethylperfluoro-1-octanesulfonamide            | 4151-50-2   | C <sub>10</sub> H <sub>6</sub> F <sub>17</sub> NO <sub>2</sub> S | 13.375               | 527.20   | 526.0                  | 165                | 169<br>219         | 29<br>29                 | F <sub>3</sub> C(CF <sub>2</sub> ) <sub>7</sub> SO <sub>2</sub> NHC <sub>2</sub> H <sub>5</sub>   |
| 6:2 FTUCA | 2H-Perfluoro-2-octenoic acid (6:2)              | 70887-88-6  | C <sub>8</sub> H <sub>2</sub> F <sub>12</sub> O <sub>2</sub>     | 7.712                | 358.08   | 357                    | 69                 | 293<br>92.9        | 13<br>49                 | F <sub>3</sub> C(CF <sub>2</sub> ) <sub>4</sub> FC=CHCOOH                                         |
| 5:3 FTCA  | 5:3 Fluorotelomer carboxylic acid               | 914637-49-3 | C <sub>8</sub> H <sub>5</sub> F <sub>11</sub> O <sub>2</sub>     | 7.597                | 342.10   | 341                    | 108                | 237<br>216.9       | 13<br>25                 | F <sub>3</sub> C(CF <sub>2</sub> ) <sub>4</sub> (CH <sub>2</sub> ) <sub>2</sub> COOH              |
| 6:2 FTCA  | 2-Perfluorohexyl ethanoic acid (6:2)            | 53826-12-3  | C <sub>8</sub> H <sub>3</sub> F <sub>13</sub> O <sub>2</sub>     | 7.037                | 378.09   | 377.0                  | 185                | 292.9<br>63.1      | 15<br>3                  | F <sub>3</sub> C(CF <sub>2</sub> ) <sub>5</sub> CH <sub>2</sub> COOH                              |
| 8:2 FTCA  | 2-Perfluorooctyl ethanoic acid (8:2)            | 27854-31-5  | C <sub>10</sub> H <sub>3</sub> F <sub>17</sub> O <sub>2</sub>    | 9.927                | 478.10   | 477.0                  | 215                | 392.9<br>63        | 15<br>3                  | F <sub>3</sub> C(CF <sub>2</sub> ) <sub>7</sub> CH <sub>2</sub> COOH                              |
| 10:2 FTCA | 2-Perfluorodecyl ethanoic acid (10:2)           | 53826-13-4  | C <sub>12</sub> H <sub>3</sub> F <sub>21</sub> O <sub>2</sub>    | 12.075               | 578.12   | 577.0                  | 245                | 492.9<br>63        | 15<br>3                  | F <sub>3</sub> C(CF <sub>2</sub> ) <sub>9</sub> CH <sub>2</sub> COOH                              |
| 4:2 FTSA  | 1H,1H,2H,2H-perfluorohexane sulfonic acid (4:2) | 757124-72-4 | C <sub>6</sub> H <sub>5</sub> F <sub>9</sub> O <sub>3</sub> S    | 4.870                | 328.15   | 327.1                  | 136                | 306.9<br>81        | 21<br>33                 | F <sub>3</sub> C(CF <sub>2</sub> ) <sub>3</sub> (CH <sub>2</sub> ) <sub>2</sub> SO <sub>3</sub> H |
| 6:2 FTSA  | 1H,1H,2H,2H-perfluorooctane sulfonic acid (6:2) | 27619-97-2  | C <sub>8</sub> H <sub>3</sub> F <sub>13</sub> O <sub>3</sub> S   | 8.091                | 428.17   | 427.0                  | 164                | 406.9<br>81        | 25<br>41                 | F <sub>3</sub> C(CF <sub>2</sub> ) <sub>5</sub> (CH <sub>2</sub> ) <sub>2</sub> SO <sub>3</sub> H |
| 8:2 FTSA  |                                                 |             | C <sub>10</sub> H <sub>3</sub> F <sub>17</sub> O <sub>3</sub> S  | 10.676               | 528.18   | 527.0                  | 179                | 506.9              | 29                       | F <sub>3</sub> C(CF <sub>2</sub> ) <sub>7</sub> (CH <sub>2</sub> ) <sub>2</sub> SO <sub>3</sub> H |

| Abbr.                           | Compound Name                                                         | CAS #       | Formula                                                                        | Retention time (min) | Mol. Wt. | Precursor ion [M-H/D]- | Fragmentor (volts) | Product ions (m/z) | Collision energy (volts) | Structure                                                                                                                                                                      |
|---------------------------------|-----------------------------------------------------------------------|-------------|--------------------------------------------------------------------------------|----------------------|----------|------------------------|--------------------|--------------------|--------------------------|--------------------------------------------------------------------------------------------------------------------------------------------------------------------------------|
|                                 | 1H,1H,2H,2H-perfluorodecane sulfonic acid (8:2)                       | 39108-34-4  |                                                                                |                      |          |                        |                    | 81                 | 41                       |                                                                                                                                                                                |
| 6:2 PAP                         | 1H,1H,2H,2H-perfluorooctylphosphate                                   | 57678-01-0  | C <sub>8</sub> H <sub>6</sub> F <sub>13</sub> O <sub>4</sub> P                 | 3.513                | 444.08   | 443.0                  | 108                | 97.0<br>79.0       | 17<br>100                | (O)P(OH) <sub>2</sub> [O(CH <sub>2</sub> ) <sub>2</sub> (CF <sub>2</sub> ) <sub>5</sub> CF <sub>3</sub> ]                                                                      |
| 8:2 PAP                         | 1H,1H,2H,2H-perfluorodecylphosphate                                   | 57678-03-2  | C <sub>10</sub> H <sub>6</sub> F <sub>17</sub> O <sub>4</sub> P                | 4.306                | 544.08   | 543.0                  | 108                | 97.0<br>79.0       | 21<br>93                 | (O)P(OH) <sub>2</sub> [O(CH <sub>2</sub> ) <sub>2</sub> (CF <sub>2</sub> ) <sub>7</sub> CF <sub>3</sub> ]                                                                      |
| 6:2 diPAP                       | Bis(1H,1H,2H,2H-perfluorooctyl)phosphate                              | 57677-95-9  | C <sub>16</sub> H <sub>9</sub> F <sub>26</sub> O <sub>4</sub> P                | 5.289                | 790.17   | 789.0                  | 132                | 442.9<br>97.0      | 17<br>37                 | (O)P(OH)[O(CH <sub>2</sub> ) <sub>2</sub> (CF <sub>2</sub> ) <sub>5</sub> CF <sub>3</sub> ] <sub>2</sub>                                                                       |
| 6:2/8:2 diPAP                   | (1H,1H,2H,2H-perfluorooctyl-1H,1H,2H,2H-perfluorodecyl)phosphate      | 943913-15-3 | C <sub>18</sub> H <sub>9</sub> F <sub>30</sub> O <sub>4</sub> P                | 5.478                | 890.20   | 889.0                  | 156                | 443.0<br>96.9      | 21<br>33                 | (O)P(OH)[O(CH <sub>2</sub> ) <sub>2</sub> (CF <sub>2</sub> ) <sub>5</sub> CF <sub>3</sub> ][O(CH <sub>2</sub> ) <sub>2</sub> (CF <sub>2</sub> ) <sub>7</sub> CF <sub>3</sub> ] |
| 8:2 diPAP                       | Bis(1H,1H,2H,2H-perfluorodecyl)phosphate                              | 678-41-1    | C <sub>20</sub> H <sub>9</sub> F <sub>34</sub> O <sub>4</sub> P                | 5.622                | 990.20   | 989.0                  | 151                | 542.9<br>97.0      | 25<br>37                 | (O)P(OH)[O(CH <sub>2</sub> ) <sub>2</sub> (CF <sub>2</sub> ) <sub>7</sub> CF <sub>3</sub> ] <sub>2</sub>                                                                       |
| M3PFBA (surrogate standard, SS) | Perfluoro-n-[2,3,4- <sup>13</sup> C <sub>3</sub> ]butanoic acid       |             | CHF <sub>7</sub> O <sub>2</sub> + <sup>13</sup> C <sub>3</sub>                 | 2.242                | 217.04   | 216.0                  | 64                 | 172                | 5                        |                                                                                                                                                                                |
| MPFHxA (SS)                     | Perfluoro-n-[1,2- <sup>13</sup> C <sub>2</sub> ]hexanoic acid         |             | C <sub>4</sub> HF <sub>11</sub> O <sub>2</sub> + <sup>13</sup> C <sub>2</sub>  | 4.999                | 316.05   | 315.1                  | 78                 | 270                | 5                        |                                                                                                                                                                                |
| MPFOA (SS)                      | Perfluoro-n-[1,2,3,4- <sup>13</sup> C <sub>4</sub> ]octanoic acid     |             | C <sub>4</sub> HF <sub>15</sub> O <sub>2</sub> + <sup>13</sup> C <sub>4</sub>  | 8.185                | 418.07   | 417.1                  | 83                 | 372                | 5                        |                                                                                                                                                                                |
| MPFU <sub>n</sub> DA (SS)       | Perfluoro-n-[1,2- <sup>13</sup> C <sub>2</sub> ]undecanoic acid       |             | C <sub>9</sub> HF <sub>21</sub> O <sub>2</sub> + <sup>13</sup> C <sub>2</sub>  | 11.725               | 566.09   | 565.1                  | 97                 | 520                | 9                        |                                                                                                                                                                                |
| M2PFTeDA (SS)                   | Perfluoro-n-[1,2- <sup>13</sup> C <sub>2</sub> ]tetradecanoic acid    |             | C <sub>12</sub> HF <sub>27</sub> O <sub>2</sub> + <sup>13</sup> C <sub>2</sub> | 13.997               | 716.11   | 715.1                  | 116                | 669.9              | 13                       |                                                                                                                                                                                |
| M3PFBS (SS)                     | Perfluoro-1-[2,3,4- <sup>13</sup> C <sub>3</sub> ]butanesulfonic acid |             | CHF <sub>9</sub> SO <sub>3</sub> + <sup>13</sup> C <sub>3</sub>                | 3.874                | 303.10   | 302.0                  | 149                | 80                 | 45                       |                                                                                                                                                                                |
| MPFHxS (SS)                     | Perfluoro-1-hexanel <sup>18</sup> O <sub>2</sub> ]sulfonic acid       |             | C <sub>6</sub> HF <sub>13</sub> SO + <sup>18</sup> O <sub>2</sub>              | 6.882                | 404.11   | 403.0                  | 169                | 84                 | 49                       |                                                                                                                                                                                |

| Abbr.                         | Compound Name                                                                           | CAS # | Formula                                                                                        | Retention time (min) | Mol. Wt. | Precursor ion [M-H/D]- | Fragmentor (volts) | Product ions (m/z) | Collision energy (volts) | Structure |
|-------------------------------|-----------------------------------------------------------------------------------------|-------|------------------------------------------------------------------------------------------------|----------------------|----------|------------------------|--------------------|--------------------|--------------------------|-----------|
| MPFOS (SS)                    | Perfluoro-1-[1,2,3,4- <sup>13</sup> C <sub>4</sub> ]octanesulfonic acid                 |       | C <sub>4</sub> HF <sub>17</sub> SO <sub>3</sub> + <sup>13</sup> C <sub>4</sub>                 | 9.646                | 504.13   | 503.0                  | 198                | 80                 | 93                       |           |
| dMeFOSA (SS)                  | N-methyl-d <sub>3</sub> -perfluoro-1-octanesulfonamide                                  |       | C <sub>9</sub> HF <sub>17</sub> NO <sub>2</sub> S + D <sub>3</sub>                             | 12.799               | 516.17   | 515.0                  | 160                | 169                | 29                       |           |
| M2-8:2 FTCA (SS)              | 2-Perfluorooctyl-[1,2- <sup>13</sup> C <sub>2</sub> ]-ethanoic acid(8:2)                |       | C <sub>8</sub> H <sub>3</sub> F <sub>17</sub> O <sub>2</sub> + <sup>13</sup> C <sub>2</sub>    | 9.926                | 480.10   | 479.0                  | 215                | 394                | 11                       |           |
| M2-8:2 FTSA (SS)              | 1H,1H,2H,2H-perfluoro-1-[1,2- <sup>13</sup> C <sub>2</sub> ]-decane sulfonic acid (8:2) |       | C <sub>8</sub> H <sub>5</sub> F <sub>17</sub> O <sub>3</sub> S + <sup>13</sup> C <sub>2</sub>  | 10.675               | 530.18   | 529.0                  | 195                | 509                | 33                       |           |
| M2-8:2 PAP (SS)               | 1H,1H,2H,2H-[1,2- <sup>13</sup> C <sub>2</sub> ]perfluorodecylphosphate                 |       | C <sub>8</sub> H <sub>6</sub> F <sub>17</sub> O <sub>4</sub> P + <sup>13</sup> C <sub>2</sub>  | 4.305                | 546.08   | 545.0                  | 113                | 97.0               | 17                       |           |
| MPFBA (internal standard, IS) | Perfluoro-n-[1,2,3,4- <sup>13</sup> C <sub>4</sub> ]butanoic acid                       |       | HF <sub>7</sub> O <sub>2</sub> + <sup>13</sup> C <sub>4</sub>                                  | 2.240                | 218.04   | 217.0                  | 64                 | 172                | 5                        |           |
| M8PFOA (IS)                   | Perfluoro-n-[ <sup>13</sup> C <sub>8</sub> ]octanoic acid                               |       | HF <sub>15</sub> O <sub>2</sub> + <sup>13</sup> C <sub>8</sub>                                 | 8.184                | 422.07   | 421.1                  | 83                 | 376                | 5                        |           |
| M7PFUnDA (IS)                 | Perfluoro-n-[1,2,3,4,5,6,7- <sup>13</sup> C <sub>7</sub> ]undecanoic acid               |       | C <sub>4</sub> HF <sub>21</sub> O <sub>2</sub> + <sup>13</sup> C <sub>7</sub>                  | 11.724               | 571.09   | 570.0                  | 97                 | 525                | 9                        |           |
| M3PFHxS (IS)                  | Perfluoro-1-[1,2,3- <sup>13</sup> C <sub>3</sub> ]hexanesulfonic acid                   |       | C <sub>3</sub> HF <sub>13</sub> SO <sub>3</sub> + <sup>13</sup> C <sub>3</sub>                 | 6.883                | 403.11   | 402.0                  | 184                | 80                 | 45                       |           |
| M8PFOS (IS)                   | Perfluoro-[ <sup>13</sup> C <sub>8</sub> ]octanesulfonic acid                           |       | HF <sub>17</sub> SO <sub>3</sub> + <sup>13</sup> C <sub>8</sub>                                | 9.637                | 508.13   | 507.0                  | 203                | 79.9               | 97                       |           |
| M4-6:2 diPAP (IS)             | Bis(1H,1H,2H,2H-[1,2- <sup>13</sup> C <sub>2</sub> ]perfluorooctyl)phosphate            |       | C <sub>12</sub> H <sub>9</sub> F <sub>26</sub> O <sub>4</sub> P + <sup>13</sup> C <sub>4</sub> | 5.288                | 794.17   | 793.0                  | 137                | 445.0              | 21                       |           |

**Table S6.** List of targeted PFAS measured by GC-MS.

| Abbr.            | Compound Name                                                                                          | CAS #      | Formula                                                                                       | Mol. Wt. | Retention time (min) | Quantifier | Qualifier | Structure                                                                                                                            |
|------------------|--------------------------------------------------------------------------------------------------------|------------|-----------------------------------------------------------------------------------------------|----------|----------------------|------------|-----------|--------------------------------------------------------------------------------------------------------------------------------------|
| 4:2 FTOH         | 2-Perfluorobutyl ethanol (4:2)                                                                         | 2043-47-2  | C <sub>6</sub> H <sub>5</sub> F <sub>9</sub> O                                                | 264.09   | 5.840                | 265        | 227       | F <sub>3</sub> C(CF <sub>2</sub> ) <sub>3</sub> (CH <sub>2</sub> ) <sub>2</sub> OH                                                   |
| 6:2 FTOH         | 2-Perfluorohexyl ethanol (6:2)                                                                         | 647-42-7   | C <sub>8</sub> H <sub>5</sub> F <sub>13</sub> O                                               | 364.10   | 7.569                | 365        | 327       | F <sub>3</sub> C(CF <sub>2</sub> ) <sub>5</sub> (CH <sub>2</sub> ) <sub>2</sub> OH                                                   |
| 8:2 FTOH         | 2-Perfluorooctyl ethanol (8:2)                                                                         | 678-39-7   | C <sub>10</sub> H <sub>5</sub> F <sub>17</sub> O                                              | 464.12   | 9.993                | 465        | 427       | F <sub>3</sub> C(CF <sub>2</sub> ) <sub>7</sub> (CH <sub>2</sub> ) <sub>2</sub> OH                                                   |
| 10:2 FTOH        | 2-Perfluorodecyl ethanol (10:2)                                                                        | 865-86-1   | C <sub>12</sub> H <sub>5</sub> F <sub>21</sub> O                                              | 564.13   | 12.460               | 565        | 527       | F <sub>3</sub> C(CF <sub>2</sub> ) <sub>9</sub> (CH <sub>2</sub> ) <sub>2</sub> OH                                                   |
| 6:2 FTAc         | 1H,1H,2H,2H-perfluorooctyl acrylate                                                                    | 17527-29-6 | C <sub>11</sub> H <sub>7</sub> F <sub>13</sub> O <sub>2</sub>                                 | 418.15   | 6.450                | 419        | 399       | F <sub>3</sub> C(CF <sub>2</sub> ) <sub>5</sub> (CH <sub>2</sub> ) <sub>2</sub> COOCH=CH <sub>2</sub>                                |
| 8:2 FTAc         | 1H,1H,2H,2H-Perfluorodecyl acrylate                                                                    | 27905-45-9 | C <sub>13</sub> H <sub>7</sub> F <sub>17</sub> O <sub>2</sub>                                 | 518.17   | 9.100                | 519        | 499       | F <sub>3</sub> C(CF <sub>2</sub> ) <sub>7</sub> (CH <sub>2</sub> ) <sub>2</sub> COOCH=CH <sub>2</sub>                                |
| 10:2FTAc         | 1H,1H,2H,2H-Perfluorododecyl acrylate                                                                  | 17741-60-5 | C <sub>15</sub> H <sub>7</sub> F <sub>21</sub> O <sub>2</sub>                                 | 618.18   | 11.916               | 619        | 599       | F <sub>3</sub> C(CF <sub>2</sub> ) <sub>9</sub> (CH <sub>2</sub> ) <sub>2</sub> COOCH=CH <sub>2</sub>                                |
| 6:2 FTMAc        | 1H,1H,2H,2H-perfluorooctyl methacrylate                                                                | 2144-53-8  | C <sub>12</sub> H <sub>9</sub> F <sub>13</sub> O <sub>2</sub>                                 | 432.18   | 7.672                | 433        | 413       | F <sub>3</sub> C(CF <sub>2</sub> ) <sub>5</sub> (CH <sub>2</sub> ) <sub>2</sub> COOC(=CH <sub>2</sub> )CH <sub>3</sub>               |
| 8:2 FTMAc        | 1H,1H,2H,2H-heptadecafluorodecyl methacrylate                                                          | 1996-88-9  | C <sub>14</sub> H <sub>9</sub> F <sub>17</sub> O <sub>2</sub>                                 | 532.19   | 10.413               | 533        | 513       | F <sub>3</sub> C(CF <sub>2</sub> ) <sub>7</sub> (CH <sub>2</sub> ) <sub>2</sub> COOC(=CH <sub>2</sub> )CH <sub>3</sub>               |
| MeFOSE           | 2-(N-methylperfluoro-1-octanesulfonamido)-ethanol                                                      | 24448-09-7 | C <sub>11</sub> H <sub>8</sub> F <sub>17</sub> NO <sub>3</sub> S                              | 557.22   | 19.068               | 558        | 540       | F <sub>3</sub> C(CF <sub>2</sub> ) <sub>7</sub> SO <sub>2</sub> N(-CH <sub>3</sub> )(CH <sub>2</sub> ) <sub>2</sub> OH               |
| EtFOSE           | 2-(N-ethylperfluoro-1-octanesulfonamido)-ethanol                                                       | 1691-99-2  | C <sub>12</sub> H <sub>10</sub> F <sub>17</sub> NO <sub>3</sub>                               | 571.25   | 19.194               | 572        | 554       | F <sub>3</sub> C(CF <sub>2</sub> ) <sub>7</sub> SO <sub>2</sub> N(-C <sub>2</sub> H <sub>5</sub> )(CH <sub>2</sub> ) <sub>2</sub> OH |
| M4-4:2 FTOH (SS) | 2-Perfluorobutyl-[1,1,2,2- <sup>2</sup> H <sub>4</sub> ]-ethanol(4:2)                                  |            | C <sub>6</sub> HF <sub>9</sub> O + D <sub>4</sub>                                             | 268.09   | 5.776                | 269        | 230       |                                                                                                                                      |
| M2-8:2 FTOH (SS) | 2-Perfluorooctyl-[1,2- <sup>13</sup> C <sub>2</sub> ]-ethanol(8:2)                                     |            | C <sub>8</sub> H <sub>5</sub> F <sub>17</sub> O + <sup>13</sup> C <sub>2</sub>                | 466.12   | 9.985                | 467        | 429       |                                                                                                                                      |
| dMeFOSE (SS)     | 2-(N-methyl-d <sub>3</sub> -perfluoro-1-octanesulfonamido)ethan-d <sub>4</sub> -ol                     |            | C <sub>11</sub> H <sub>1</sub> F <sub>17</sub> NO <sub>3</sub> S + D <sub>7</sub>             | 564.22   | 19.028               | 565        | 547       |                                                                                                                                      |
| M4-8:2 FTOH (IS) | 2-Perfluorooctyl-[1,1- <sup>2</sup> H <sub>2</sub> ]-[1,2- <sup>13</sup> C <sub>2</sub> ]-ethanol(8:2) |            | C <sub>8</sub> H <sub>3</sub> F <sub>17</sub> O + <sup>13</sup> C <sub>2</sub> D <sub>2</sub> | 468.12   | 9.946                | 469        | 431       |                                                                                                                                      |

**Table S7:** Surrogate (SS) and internal (IS) standards used to calculate PFAS concentrations.

| Native PFAS         | SS for correction   | IS for quantitation  | Surrogate standards | IS for quantitation  |
|---------------------|---------------------|----------------------|---------------------|----------------------|
| PFP <sub>r</sub> A  | M3PFBA              | MPFBA                | M3PFBA              | MPFBA                |
| PFBA                | M3PFBA              | MPFBA                | MPFH <sub>x</sub> A | M8PFOA               |
| PFPeA               | M3PFBA              | MPFBA                | MPFOA               | M8PFOA               |
| PFH <sub>x</sub> A  | MPFH <sub>x</sub> A | M8PFOA               | MPFUnDA             | M7PFUnDA             |
| PFHpA               | MPFH <sub>x</sub> A | M8PFOA               | M2PFTeDA            | M7PFUnDA             |
| PFOA                | MPFOA               | M8PFOA               | M3PFBS              | M3PFH <sub>x</sub> S |
| PFNA                | MPFOA               | M8PFOA               | MPFH <sub>x</sub> S | M3PFH <sub>x</sub> S |
| PFDA                | MPFUnDA             | M7PFUnDA             | MPFOS               | M8PFOS               |
| PFUnDA              | MPFUnDA             | M7PFUnDA             | M2-8:2 FTCA         | M8PFOA               |
| PFDoDA              | M2PFTeDA            | M7PFUnDA             | M2-8:2 FTSA         | M8PFOS               |
| PFT <sub>r</sub> DA | M2PFTeDA            | M7PFUnDA             | dMeFOSA             | M8PFOS               |
| PFTeDA              | M2PFTeDA            | M7PFUnDA             | M4-4:2 FTOH         | M4-8:2 FTOH          |
| PFH <sub>x</sub> DA | M2PFTeDA            | M7PFUnDA             | M2-8:2 FTOH         | M4-8:2 FTOH          |
| PFP <sub>r</sub> S  | M3PFBS              | M3PFH <sub>x</sub> S | dMeFOSE             | M4-8:2 FTOH          |
| PFBS                | M3PFBS              | M3PFH <sub>x</sub> S | M2-8:2 PAP          | M4-6:2 diPAP         |
| PFPeS               | MPFH <sub>x</sub> S | M3PFH <sub>x</sub> S |                     |                      |
| PFH <sub>x</sub> S  | MPFH <sub>x</sub> S | M3PFH <sub>x</sub> S |                     |                      |
| PFHpS               | MPFOS               | M3PFH <sub>x</sub> S |                     |                      |
| PFOS                | MPFOS               | M8PFOS               |                     |                      |
| PFNS                | MPFOS               | M8PFOS               |                     |                      |
| PFDS                | MPFOS               | M8PFOS               |                     |                      |
| PFECHS              | MPFOS               | M8PFOS               |                     |                      |
| Cl-PFOS             | MPFOS               | M8PFOS               |                     |                      |
| 6:2 Cl-PFESA        | MPFH <sub>x</sub> S | M8PFOS               |                     |                      |
| 8:2 Cl-PFESA        | MPFOS               | M8PFOS               |                     |                      |
| 4:2 FTSA            | M2-8:2 FTSA         | M3PFH <sub>x</sub> S |                     |                      |
| 6:2 FTSA            | M2-8:2 FTSA         | M3PFH <sub>x</sub> S |                     |                      |
| 8:2 FTSA            | M2-8:2 FTSA         | M8PFOS               |                     |                      |
| 6:2 FTUCA           | M2-8:2 FTCA         | M8PFOA               |                     |                      |
| 5:3 FTCA            | M2-8:2 FTCA         | M8PFOA               |                     |                      |
| 6:2 FTCA            | M2-8:2 FTCA         | M8PFOA               |                     |                      |
| 8:2 FTCA            | M2-8:2 FTCA         | M8PFOA               |                     |                      |
| 10:2 FTCA           | M2-8:2 FTCA         | M8PFOA               |                     |                      |
| FBSA                | M3PFBS              | M3PFH <sub>x</sub> S |                     |                      |
| FH <sub>x</sub> SA  | MPFH <sub>x</sub> S | M3PFH <sub>x</sub> S |                     |                      |

|               |             |              |
|---------------|-------------|--------------|
| FOSA          | MPFOS       | M8PFOS       |
| MeFOSA        | dMeFOSA     | M8PFOS       |
| EtFOSA        | dMeFOSA     | M8PFOS       |
| 4:2 FTOH      | M4-4:2 FTOH | M4-8:2 FTOH  |
| 6:2 FTOH      | M2-8:2 FTOH | M4-8:2 FTOH  |
| 8:2 FTOH      | M2-8:2 FTOH | M4-8:2 FTOH  |
| 10:2 FTOH     | M2-8:2 FTOH | M4-8:2 FTOH  |
| MeFOSE        | dMeFOSE     | M4-8:2 FTOH  |
| EtFOSE        | dMeFOSE     | M4-8:2 FTOH  |
| 6:2 FTAc      | M4-4:2 FTOH | M4-8:2 FTOH  |
| 8:2 FTAc      | M2-8:2 FTOH | M4-8:2 FTOH  |
| 10:2 FTAc     | M2-8:2 FTOH | M4-8:2 FTOH  |
| 6:2 FTMAc     | M2-8:2 FTOH | M4-8:2 FTOH  |
| 8:2 FTMAc     | M2-8:2 FTOH | M4-8:2 FTOH  |
| 6:2 PAP       | M2-8:2 PAP  | M4-6:2 diPAP |
| 8:2 PAP       | M2-8:2 PAP  | M4-6:2 diPAP |
| 6:2 diPAP     | M2-8:2 PAP  | M4-6:2 diPAP |
| 6:2/8:2 diPAP | M2-8:2 PAP  | M4-6:2 diPAP |
| 8:2 diPAP     | M2-8:2 PAP  | M4-6:2 diPAP |

**Table S8:** Replicate values for the targeted analysis of a field duplicate sample. Only compounds measured above the LOD are reported.

| Sample Type  | Description               | PFPrA | PFBA | PFHxA | PFHpA | PFOA | PFNA | PFDA | PFUnDA | PFDoDA | PFTrDA | PFTeDA | PFHxDA | 6:2 diPAP | Σ PFAS |
|--------------|---------------------------|-------|------|-------|-------|------|------|------|--------|--------|--------|--------|--------|-----------|--------|
| Popcorn      | Paper bag, plastic lining | 3.93  | 3.29 | 3.92  | 4.35  | 4.01 | 4.91 | 7.46 | 6.73   | 3.90   | 4.72   | 5.07   | 2.01   | 1.05      | 55.33  |
|              |                           | 3.98  | 4.65 | 4.14  | 4.09  | 4.79 | 4.56 | 6.77 | 7.38   | 4.33   | 4.28   | 4.66   | 2.12   | 1.23      | 56.97  |
| % Difference |                           | 1     | 29   | 5     | 6     | 16   | 8    | 10   | 9      | 10     | 10     | 9      | 5      | 15        | 3      |

**Table S9:** Summary of duplicate samples measured by PIGE spectroscopy.

| Sample Type    | Description               | Duplicate Type | Total F ( $\mu\text{g F/m}^2$ ) | % Difference |
|----------------|---------------------------|----------------|---------------------------------|--------------|
| Burrito roll   | Paper wrapper             | Field          | < LOD                           | N/A          |
|                |                           |                | < LOD                           |              |
| Popcorn bag 8  | Paper bag, plastic lining | Field          | < LOD                           | N/A          |
|                |                           |                | < LOD                           |              |
| Pita wrap      | Paper wrapper             | Field          | < LOD                           | N/A          |
|                |                           |                | < LOD                           |              |
| Burrito roll   | Foil wrapper              | Field          | < LOD                           | N/A          |
|                |                           |                | < LOD                           |              |
| Pastry         | Paper bag                 | Lab            | < LOD                           | N/A          |
|                |                           |                | < LOD                           |              |
| Pita wrap      | Paper wrapper             | Lab            | < LOD                           | N/A          |
|                |                           |                | < LOD                           |              |
| Donut bag      | Paper bag                 | Lab            | 11600                           | 1            |
|                |                           |                | 11700                           |              |
| Donut bag 4    | Paper bag                 | Lab            | 36000                           | 3            |
|                |                           |                | 37200                           |              |
| Burrito roll   | Paper wrapper             | Lab            | < LOD                           | N/A          |
|                |                           |                | < LOD                           |              |
| Popcorn bag 7  | Paper bag                 | Sample Period  | <LOQ                            | N/A          |
|                |                           |                | 11400                           |              |
| Donut bag      | Paper bag                 | Sample Period  | 11700                           | 33           |
|                |                           |                | 17600                           |              |
| Pastry bag 5   | Paper bag                 | Sample Period  | 21400                           | 10           |
|                |                           |                | 23800                           |              |
| Pastry bag 6   | Paper bag                 | Sample Period  | 26700                           | 5            |
|                |                           |                | 28000                           |              |
| Donut bag 4    | Paper bag                 | Sample Period  | 37200                           | 19           |
|                |                           |                | 30100                           |              |
| Burrito bowl 2 | Molded fiber bowl         | Sample Period  | 931000                          | 8            |
|                |                           |                | 1010000                         |              |
| Burrito bowl 1 | Molded fiber bowl         | Sample Period  | 1300000                         | 4            |
|                |                           |                | 1240000                         |              |
| Salad bowl 3   |                           |                | 931000                          | 21           |



|  |                   |               |         |  |
|--|-------------------|---------------|---------|--|
|  | Molded fiber bowl | Sample Period | 1180000 |  |
|--|-------------------|---------------|---------|--|

**Table S10.** Summary of total F in all food packaging samples, determined by PIGE. The number of samples does not include duplicates.

| Category | Level of total F ( $\mu\text{g}/\text{m}^2$ ) | Number of Food Packaging Samples | Percentage of Food Packaging Samples |
|----------|-----------------------------------------------|----------------------------------|--------------------------------------|
| None     | <3580 (165-3540)                              | 23                               | 55%                                  |
| Low      | >3580 – <10800 (4600-9600)                    | 8                                | 19%                                  |
| High     | >10800 (11400-1300000)                        | 11                               | 26%                                  |
|          | TOTAL                                         | 42                               | 100%                                 |

For bowls (thickness > 620  $\mu\text{m}$ ): LOD = 20600  $\mu\text{g F}/\text{m}^2$ , LOQ=62500  $\mu\text{g F}/\text{m}^2$ ; for paper bags and paper wrapper (thickness  $\leq$ 180): LOD = 3580  $\mu\text{g F}/\text{m}^2$ , LOQ=10800  $\mu\text{g F}/\text{m}^2$ . For all four bowls, the total F ranged from 1010000 to 1300000  $\mu\text{g F}/\text{m}^2$ , which was higher than 62500  $\mu\text{g F}/\text{m}^2$  (LOQ) and much higher than 10800  $\mu\text{g F}/\text{m}^2$  (LOQ for paper bag and paper wrapper). So we use 3580  $\mu\text{g F}/\text{m}^2$  (LOD) and 10800  $\mu\text{g F}/\text{m}^2$  (LOQ) for paper bag and paper wrapper to divide them into three categories, None, Low, and High (see table S10).

**Table S11.** List of fast food packaging with total fluorine > LOQ determined by PIGE (see Table S10 for list of LOQ values). Only the maximum value from each sample is listed.

| <b>Item Name (Food)</b> | <b>Item Size</b>  | <b>Category (material)</b> | <b>Description (colour, material, location)</b> | <b>Total F (<math>\mu\text{g F/m}^2</math>)</b> |
|-------------------------|-------------------|----------------------------|-------------------------------------------------|-------------------------------------------------|
| Burrito bowl 1          | Regular           | Molded fiber bowl          | Brown molded fiber, exterior                    | 1300000                                         |
| Burrito bowl 2          | Small             | Molded fiber bowl          | Brown molded fiber, interior                    | 1010000                                         |
| Salad bowl 3            | Regular           | Molded fiber bowl          | Brown molded fiber, interior                    | 1180000                                         |
| Salad bowl              | Regular           | Molded fiber bowl          | Brown molded fiber, exterior                    | 1070000                                         |
| Donut bag 4             | Regular           | Paper bag                  | White paper, interior                           | 30100                                           |
| Pastry bag 5            | Regular           | Paper bag                  | Brown paper, interior                           | 23800                                           |
| Pastry bag 6            | Regular           | Paper bag                  | Brown paper, interior                           | 28000                                           |
| Popcorn bag 7           | Very small (grab) | Paper bag                  | White paper, interior                           | 11400                                           |
| Donut                   | Regular           | Paper bag                  | Brown paper, interior                           | 17600                                           |
| Donut bag               | Regular           | Paper bag                  | White paper, interior                           | 17600                                           |
| Burger                  | Small (buddy)     | Paper bag                  | White paper, interior                           | 12100                                           |

**Table S12a.** Full results for all samples selected for targeted analysis using LC-MS/MS and GC-MS. Concentrations of each analyte are given in ng/g (ppb). Cells containing values <LOD are left empty. Only compounds detected in any sample above the LOD are listed. Since popcorn bag 8 had a field duplicate, the numbers showed in both tables (S12a &b) are average value.

| Category                                  | Compound Concentration (ng/g) |      |       |       |       |      |      |      |        |        |        |        |        |      |          |         |         |           |          |          |          |           |           |          |       |
|-------------------------------------------|-------------------------------|------|-------|-------|-------|------|------|------|--------|--------|--------|--------|--------|------|----------|---------|---------|-----------|----------|----------|----------|-----------|-----------|----------|-------|
|                                           | PFPrA                         | PFBA | PFPeA | PFHxA | PFHpA | PFOA | PFNA | PFDA | PFUnDA | PFDoDA | PFTrDA | PFTeDA | PFHxDA | PFBS | 6:2 FTSA | 6:2 PAP | 8:2 PAP | 6:2 diPAP | 6:2 FTOH | 8:2 FTOH | 6:2 FTAc | 6:2 FTMAc | 6:2 FTUCA | 5:3 FTCA | ΣPFAS |
| Burrito bowl 1                            | 1.28                          | 0.75 | 0.84  | 1.45  | 0.15  |      |      |      |        |        |        |        |        |      |          | 58.0    | 27.2    |           | 294      |          |          | 598       | 4.94      |          | 987   |
| Burrito bowl 2                            | 1.54                          | 1.23 |       | 8.50  | 1.59  | 0.06 |      | 0.19 |        | 0.06   |        |        |        |      | 0.20     | 11.9    | 10.3    |           | 885      | 8.00     | 28.0     | 681       | 1.70      | 0.01     | 1639  |
| Salad bowl 3                              | 0.66                          |      |       | 4.12  | 0.24  |      |      |      |        |        |        |        |        | 0.04 |          |         |         |           | 486      | 9.82     |          | 430       | 1.41      | 0.03     | 932   |
| Donut paper bag 4                         |                               | 11.3 |       | 0.65  |       |      |      |      |        |        |        |        |        |      |          |         |         |           | 1483     |          | 17.5     | 5668      |           |          | 7181  |
| Pastry bag 5                              |                               | 10.5 |       | 4.00  | 0.65  |      |      |      |        |        |        |        |        |      |          |         |         |           | 1126     | 79.9     |          | 3407      |           |          | 4628  |
| Pastry bag 6                              |                               | 16.5 |       |       |       |      |      |      |        |        |        |        |        |      |          |         |         |           | 1160     |          | 30.2     | 4672      |           |          | 5879  |
| Popcorn bag 7                             |                               |      |       | 2.39  | 1.43  |      |      |      | 1.57   | 1.28   | 2.74   | 2.53   |        |      |          |         |         |           | 1735     |          | 232      | 4575      |           |          | 6554  |
| Popcorn bag 8 (paper with plastic lining) | 3.95                          | 3.97 |       | 4.03  | 4.22  | 4.40 | 4.73 | 7.11 | 7.06   | 4.12   | 4.50   | 4.86   | 2.06   |      |          |         |         | 1.14      |          |          |          |           |           |          | 56.2  |

b. Re-analyzed results for all samples selected for targeted analysis using LC-MS/MS and GC-MS after being in storage for ~2 years. Concentrations of each analyte are given in ng/g (ppb). Cells containing values <LOD are left empty. Only compounds detected in any sample above the LOD are listed.

| Category                                  | Compound Concentration (ng/g) |      |       |       |       |      |      |      |        |        |        |        |        |      |          |         |         |           |          |          |          |           |           |          |       |
|-------------------------------------------|-------------------------------|------|-------|-------|-------|------|------|------|--------|--------|--------|--------|--------|------|----------|---------|---------|-----------|----------|----------|----------|-----------|-----------|----------|-------|
|                                           | PFPrA                         | PFBA | PFPeA | PFHxA | PFHpA | PFOA | PFNA | PFDA | PFUnDA | PFDoDA | PFTeDA | PFTeDA | PFHxDA | PFBS | 6:2 FTSA | 6:2 PAP | 8:2 PAP | 6:2 diPAP | 6:2 FTOH | 8:2 FTOH | 6:2 FTAc | 6:2 FTMAc | 6:2 FTUCA | 5:3 FTCA | ∑PFAS |
| Burrito bowl 1                            | 9.11                          | 0.68 | 0.64  | 4.14  | 0.40  |      |      |      | 0.06   |        |        |        |        |      |          |         |         |           | 995      |          |          | 206       | 30.7      |          | 1247  |
| Burrito bowl 2                            | 5.59                          | 3.19 | 1.46  | 15.4  | 2.60  | 0.20 |      |      |        | 0.19   |        | 0.11   |        |      |          |         |         |           | 1252     |          | 49.6     | 173       | 8.70      | 0.34     | 1512  |
| Salad bowl 3                              | 5.18                          | 1.39 | 0.54  | 6.61  | 0.44  |      |      |      | 0.08   |        |        |        |        |      |          |         |         |           | 852      |          | 2.01     | 22.9      | 8.21      | 0.26     | 900   |
| Donut paper bag 4                         |                               |      |       | 1.12  |       |      |      |      |        |        |        |        |        |      |          |         |         |           | 1022     |          | 15.8     | 49.8      |           |          | 1089  |
| Pastry bag 5                              | 3.01                          |      |       | 6.15  | 1.17  |      |      |      |        |        |        |        |        |      |          |         |         |           | 1190     |          | 10.2     |           |           |          | 1211  |
| Pastry bag 6                              |                               |      |       |       |       |      |      |      |        |        |        |        |        |      |          |         |         |           | 957      |          | 34.4     |           |           |          | 991   |
| Popcorn bag 7                             | 7.49                          |      | 1.28  | 0.71  |       |      |      |      | 1.88   | 0.77   |        |        | 2.49   |      |          |         |         |           | 2256     |          | 164      |           |           |          | 2434  |
| Popcorn bag 8 (paper with plastic lining) | 12.3                          | 6.68 | 5.11  | 4.89  | 4.59  | 4.97 | 5.61 | 7.13 | 7.20   | 6.75   | 6.42   | 5.08   | 1.84   |      |          |         |         |           | 51.9     |          |          |           |           |          | 130   |

**Table S13.** Summary of 22 PFAS tentatively identified using non-targeted analysis.

Confidence levels were assigned according to the information provided in the ‘Fragments’ column. The mass spectra of representative classes of PFAS are shown in Figures S6 to S11.

| Compound Group                                                                       | Compound  | [M-H] <sup>-</sup>                                           | m/z      | RT (min) | Confidence Level | Fragments                                                                                                                                                                                                                                                                   | Present in Sample(s) |
|--------------------------------------------------------------------------------------|-----------|--------------------------------------------------------------|----------|----------|------------------|-----------------------------------------------------------------------------------------------------------------------------------------------------------------------------------------------------------------------------------------------------------------------------|----------------------|
| A, Fluorotelomer Unsaturated Carboxylic Acid                                         | 6:2 FTUCA | C <sub>8</sub> HF <sub>12</sub> O <sub>2</sub>               | 356.9789 | 6.15     | 1                | [M-HF-CO <sub>2</sub> -H] <sup>-</sup> , [M-CF <sub>2</sub> -HF-CO <sub>2</sub> -H] <sup>-</sup>                                                                                                                                                                            | 1, 2, 3              |
| B, n:3 Fluorotelomer Carboxylic Acids                                                | 5:3 FTCA  | C <sub>8</sub> H <sub>4</sub> F <sub>11</sub> O <sub>2</sub> | 341.0035 | 6.31     | 2                | [M-C <sub>2</sub> H <sub>4</sub> -CO <sub>2</sub> -H] <sup>-</sup> , [M-2HF-H <sub>2</sub> -CO <sub>2</sub> -H] <sup>-</sup> , [M-4HF-CO <sub>2</sub> -H] <sup>-</sup>                                                                                                      | 2, 3                 |
|                                                                                      | 6:3 FTCA  | C <sub>9</sub> H <sub>4</sub> F <sub>13</sub> O <sub>2</sub> | 391.0007 | 6.66     | 2                | [M-C <sub>2</sub> H <sub>4</sub> -CO <sub>2</sub> -H] <sup>-</sup> , [M-2HF-H <sub>2</sub> -CO <sub>2</sub> -H] <sup>-</sup> , [M-3HF-CO <sub>2</sub> -H] <sup>-</sup> , [M-4HF-CO <sub>2</sub> -H] <sup>-</sup> , [M-CF <sub>2</sub> -4HF-CO <sub>2</sub> -H] <sup>-</sup> | 2                    |
| C, Multiple H-Substituted-Ether-Substituted-Polyfluoroalkyl (linear) Carboxylic Acid | n=6       | C <sub>9</sub> H <sub>4</sub> F <sub>13</sub> O <sub>3</sub> | 406.9956 | 6.55     | 3                | [M-3HF-CO <sub>2</sub> -H] <sup>-</sup> , [M-2HF-OCH <sub>2</sub> -CO <sub>2</sub> -H] <sup>-</sup> , [M-4HF-CO <sub>2</sub> -H] <sup>-</sup>                                                                                                                               | 2                    |
| D, Double Bond Perfluoroalkyl (linear) Carboxylic Acids                              | n=3       | C <sub>11</sub> F <sub>19</sub> O <sub>2</sub>               | 524.9600 | 5.52     | 3                | [M-CO <sub>2</sub> -H] <sup>-</sup>                                                                                                                                                                                                                                         | 8                    |
|                                                                                      | n=4       | C <sub>12</sub> F <sub>21</sub> O <sub>2</sub>               | 574.9567 | 5.82     | 3                | [M-CO <sub>2</sub> -H] <sup>-</sup> , [M-CF <sub>2</sub> -2CF-5CF <sub>2</sub> -CO <sub>2</sub> -H] <sup>-</sup>                                                                                                                                                            | 8                    |
|                                                                                      | n=5       | C <sub>7</sub> HF <sub>12</sub> O <sub>2</sub>               | 344.9785 | 5.43     | 4                | No fragments found                                                                                                                                                                                                                                                          | 8                    |

|                                                           |      |                                                 |          |      |   |                                                                                                    |      |
|-----------------------------------------------------------|------|-------------------------------------------------|----------|------|---|----------------------------------------------------------------------------------------------------|------|
| E, H-substituted Perfluoroalkyl (linear) Carboxylic Acids | n=6  | C <sub>8</sub> HF <sub>14</sub> O <sub>2</sub>  | 394.9753 | 5.86 | 3 | [M-6CF <sub>2</sub> -CHF-CO <sub>2</sub> -H] <sup>-</sup>                                          | 8    |
|                                                           | n=7  | C <sub>9</sub> HF <sub>16</sub> O <sub>2</sub>  | 444.9721 | 6.21 | 4 | No fragments found                                                                                 | 8    |
|                                                           | n=8  | C <sub>10</sub> HF <sub>18</sub> O <sub>2</sub> | 494.9689 | 6.48 | 3 | [M-6CF <sub>2</sub> -CHF-CO <sub>2</sub> -H] <sup>-</sup>                                          | 8    |
|                                                           | n=9  | C <sub>11</sub> HF <sub>20</sub> O <sub>2</sub> | 544.9669 | 6.74 | 3 | [M-HF-CO <sub>2</sub> -H] <sup>-</sup> , [M-6CF <sub>2</sub> -CHF-CO <sub>2</sub> -H] <sup>-</sup> | 5, 8 |
|                                                           | n=10 | C <sub>12</sub> HF <sub>22</sub> O <sub>2</sub> | 594.9625 | 6.96 | 3 | [M-6CF <sub>2</sub> -CHF-CO <sub>2</sub> -H] <sup>-</sup>                                          | 5, 8 |
|                                                           | n=11 | C <sub>13</sub> HF <sub>24</sub> O <sub>2</sub> | 644.9593 | 7.13 | 3 | [M-HF-CO <sub>2</sub> -H] <sup>-</sup> , [M-6CF <sub>2</sub> -CHF-CO <sub>2</sub> -H] <sup>-</sup> | 8    |
|                                                           | n=12 | C <sub>14</sub> HF <sub>26</sub> O <sub>2</sub> | 694.9561 | 7.28 | 3 | [M-HF-CO <sub>2</sub> -H] <sup>-</sup> , [M-6CF <sub>2</sub> -CHF-CO <sub>2</sub> -H] <sup>-</sup> | 8    |
| F, Perfluoroalkyl (linear) Dicarboxylic Acids             | n=7  | C <sub>9</sub> HF <sub>14</sub> O <sub>4</sub>  | 438.9651 | 3.91 | 2 | [M-HF-CO <sub>2</sub> -H] <sup>-</sup> , [M-HF-2CO <sub>2</sub> -H] <sup>-</sup>                   | 8    |
|                                                           | n=8  | C <sub>10</sub> HF <sub>16</sub> O <sub>4</sub> | 488.9619 | 4.55 | 2 | [M-HF-CO <sub>2</sub> -H] <sup>-</sup> , [M-HF-2CO <sub>2</sub> -H] <sup>-</sup>                   | 8    |
|                                                           | n=9  | C <sub>11</sub> HF <sub>18</sub> O <sub>4</sub> | 538.9587 | 5.07 | 2 | [M-HF-CO <sub>2</sub> -H] <sup>-</sup> , [M-HF-2CO <sub>2</sub> -H] <sup>-</sup>                   | 8    |
|                                                           | n=10 | C <sub>12</sub> HF <sub>20</sub> O <sub>4</sub> | 588.9562 | 5.52 | 2 | [M-HF-CO <sub>2</sub> -H] <sup>-</sup> , [M-HF-2CO <sub>2</sub> -H] <sup>-</sup>                   | 8    |
|                                                           | n=11 | C <sub>13</sub> HF <sub>22</sub> O <sub>4</sub> | 638.9536 | 5.82 | 2 | [M-HF-CO <sub>2</sub> -H] <sup>-</sup> , [M-HF-2CO <sub>2</sub> -H] <sup>-</sup>                   | 8    |
|                                                           | n=12 | C <sub>14</sub> HF <sub>24</sub> O <sub>4</sub> | 688.9491 | 6.09 | 2 | [M-HF-CO <sub>2</sub> -H] <sup>-</sup> , [M-HF-2CO <sub>2</sub> -H] <sup>-</sup>                   | 8    |
|                                                           | n=13 | C <sub>15</sub> HF <sub>26</sub> O <sub>4</sub> | 738.9459 | 6.30 | 2 | [M-HF-2CO <sub>2</sub> -H] <sup>-</sup>                                                            | 8    |

## Figures

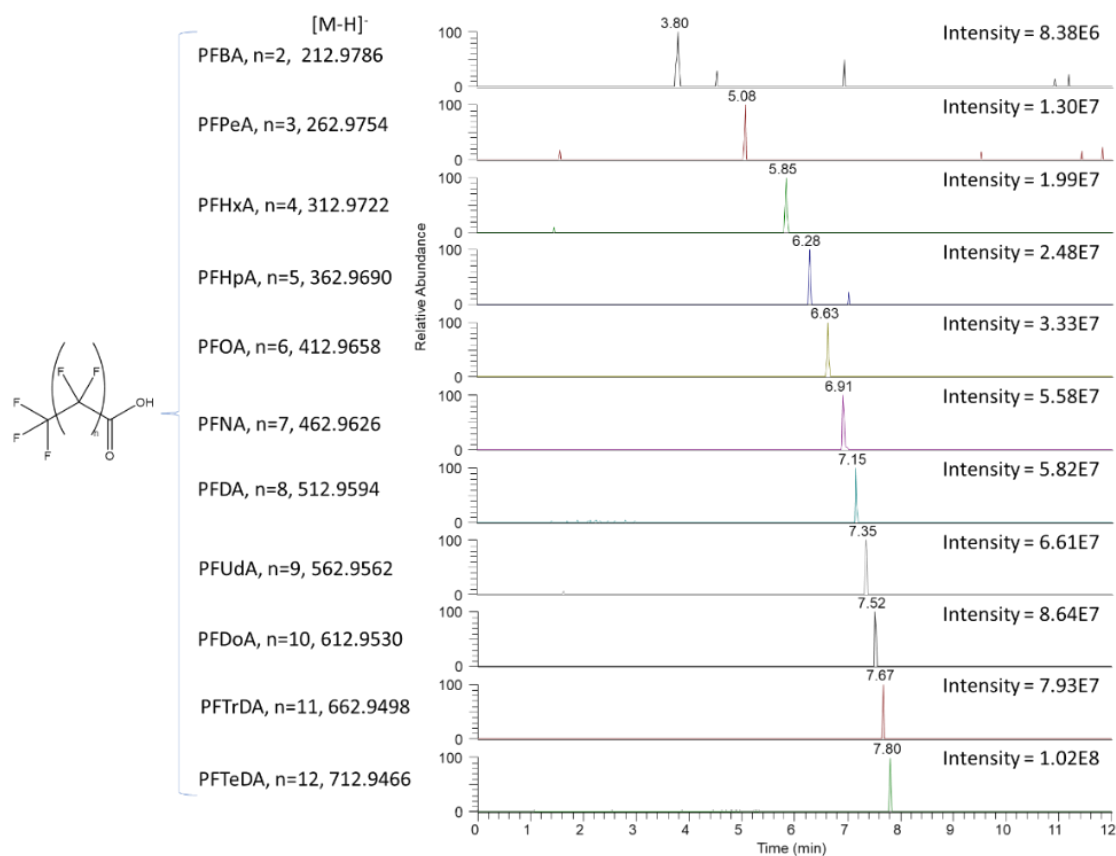

**Figure S1.** Chromatograms for the [M-H]<sup>-</sup> ion of each PFCA standard used for non-targeted analysis QA/QC testing. The retention time is listed above each peak, and the intensity of each compound at a concentration of 100 ppb is listed on the right.

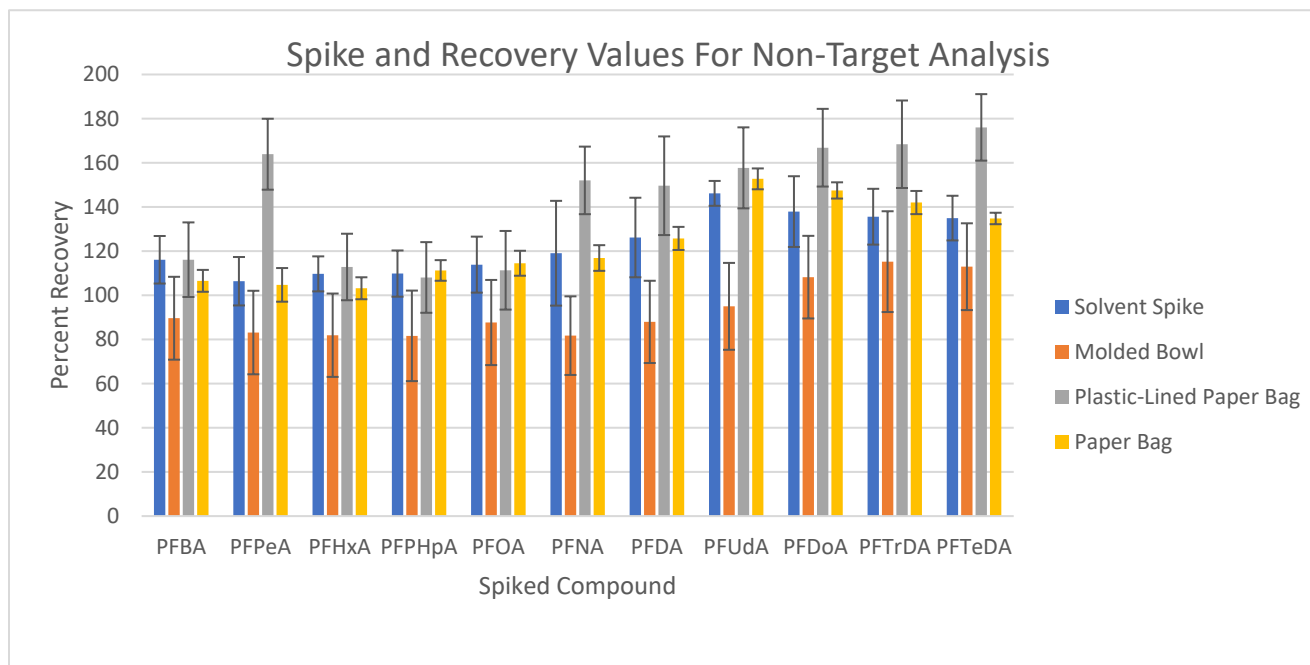

**Figure S2.** Spike and recovery values for PFCA compounds from PFBA – PFTeDA in three representative sample types. Spiked solvent was used to determine compound loss due to the extraction method. The bars represent averages of three replicates for each compound in each material, and the error bars represent the error-propagated standard deviation for each of the averaged values.



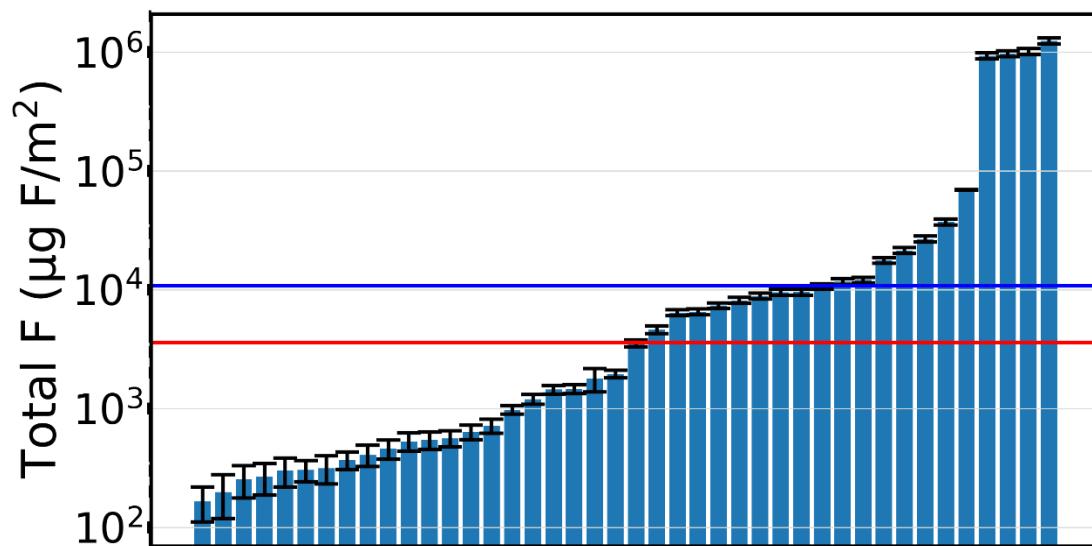

**Figure S3.** Histogram of screening data showing total F in fast food packaging samples analyzed using PIGE. The highest measured value for each individual sample was used in this analysis. The error bars represent the error of the PIGE measurement, calculated using the calibration. The lower (red) and upper (blue) horizontal lines represent the LOD (3580 µg F/m<sup>2</sup>) and LOQ (10800 µg F/m<sup>2</sup>) for paper wrapper and paper bag thickness less than 370 µm, respectively. Note that all samples which are reported below the lower horizontal line (3580 ppm F) were measured below the limit of detection and are included for frequency visualisation only.

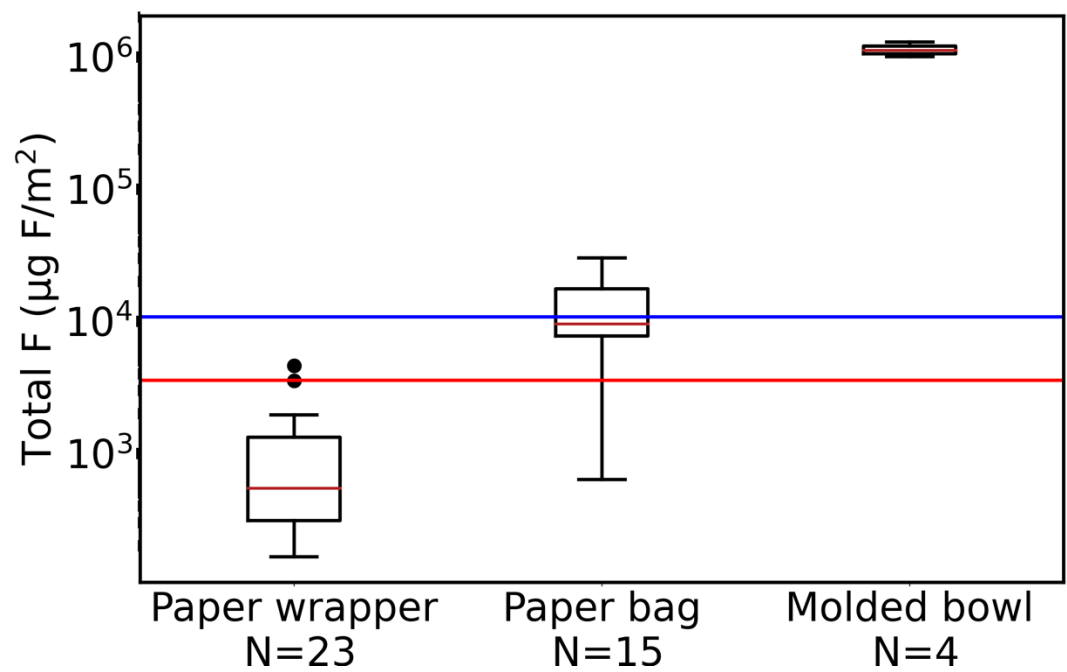

**Figure S4.** Boxplots showing total F concentration in food packaging. For each sample, the highest measurement was reported. The lower (red) and upper (blue) horizontal lines represent the LOD (3580 µg F/m<sup>2</sup>) and LOQ (10800 µg F/m<sup>2</sup>) for paper wrapper and paper bag thickness less than 370 µm, respectively.

**Figure S5.** Stacked bar chart illustrating the PFAS composition of nine samples selected for targeted analysis. SC and LC refer to short chain and long chain compounds.

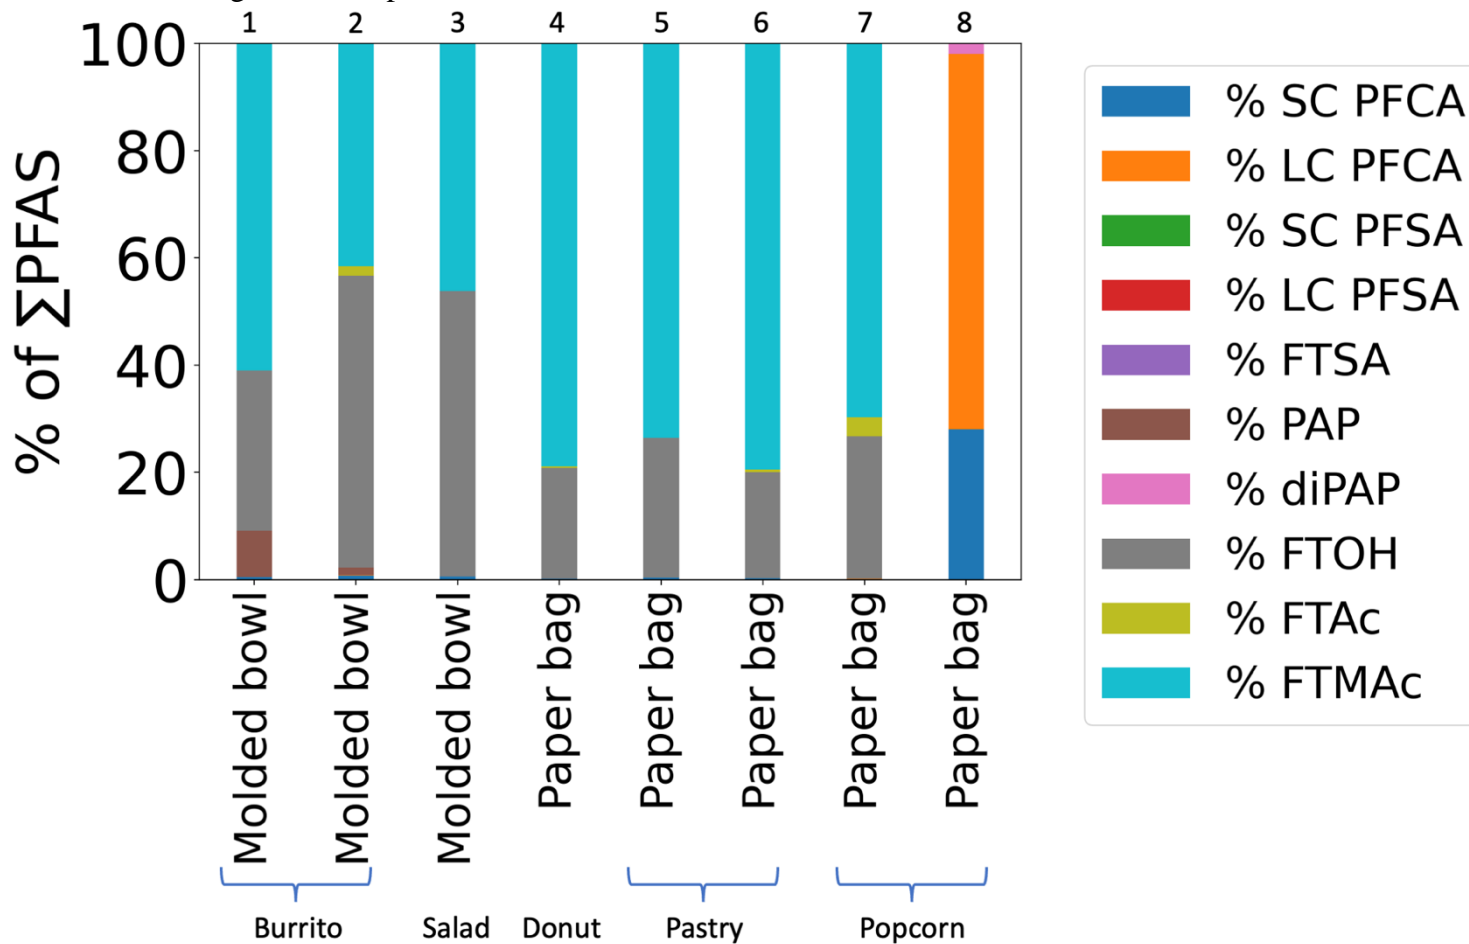

| Compound                                                                               | # of Compounds /Class | Compound Class | Sample Type (Intensity) |                        |                        |             |                        |              |               |                        |
|----------------------------------------------------------------------------------------|-----------------------|----------------|-------------------------|------------------------|------------------------|-------------|------------------------|--------------|---------------|------------------------|
|                                                                                        |                       |                | Burrito Bowl 1          | Burrito Bowl 2         | Salad Bowl 3           | Donut Bag 4 | Pastry Bag 5           | Pastry Bag 6 | Popcorn Bag 7 | Popcorn Bag 8          |
| 6:2 Fluorotelomer Unsaturated Carboxylic Acid                                          | 1                     | a              | 9.64 x 10 <sup>6</sup>  | 1.66 x 10 <sup>6</sup> | 1.88 x 10 <sup>6</sup> |             |                        |              |               |                        |
| n:3 Fluorotelomer Carboxylic Acid, n=6                                                 | 2                     | b              |                         | 6.56 x 10 <sup>4</sup> | 6.95 x 10 <sup>4</sup> |             |                        |              |               |                        |
| Multiple H-Substituted-Ether-Substituted-Perfluoroalkyl (linear) Carboxylic Acids, n=6 | 1                     | c              |                         | 1.58 x 10 <sup>4</sup> |                        |             |                        |              |               |                        |
| Double Bond Perfluoroalkyl (linear) Carboxylic Acids, n=4                              | 2                     | d              |                         |                        |                        |             |                        |              |               | 1.43 x 10 <sup>5</sup> |
| H-substituted Perfluoroalkyl (linear) Carboxylic Acids, n=9                            | 9                     | e              |                         |                        |                        |             | 2.45 x 10 <sup>4</sup> |              |               | 1.60 x 10 <sup>5</sup> |
| Perfluoroalkyl (linear) Dicarboxylic Acids, n=11                                       | 7                     | f              |                         |                        |                        |             |                        |              |               | 3.61 x 10 <sup>5</sup> |

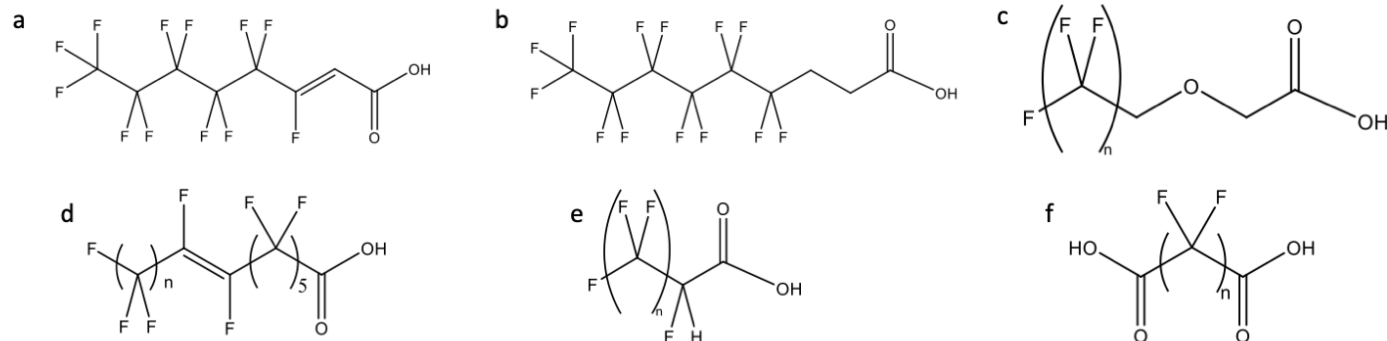

**Figure S6:** Summary of all compound groups identified using non-targeted analysis. The blank-subtracted intensity of a representative compound from each class is listed in the table and shaded such that a darker color indicates a higher intensity measurement. Structural diagrams for each class are illustrated below the table. For compound groups c and e, it was not possible to locate the exact positions of the H-substitutions, and for group d, it was not possible to locate the exact position of the double bond.

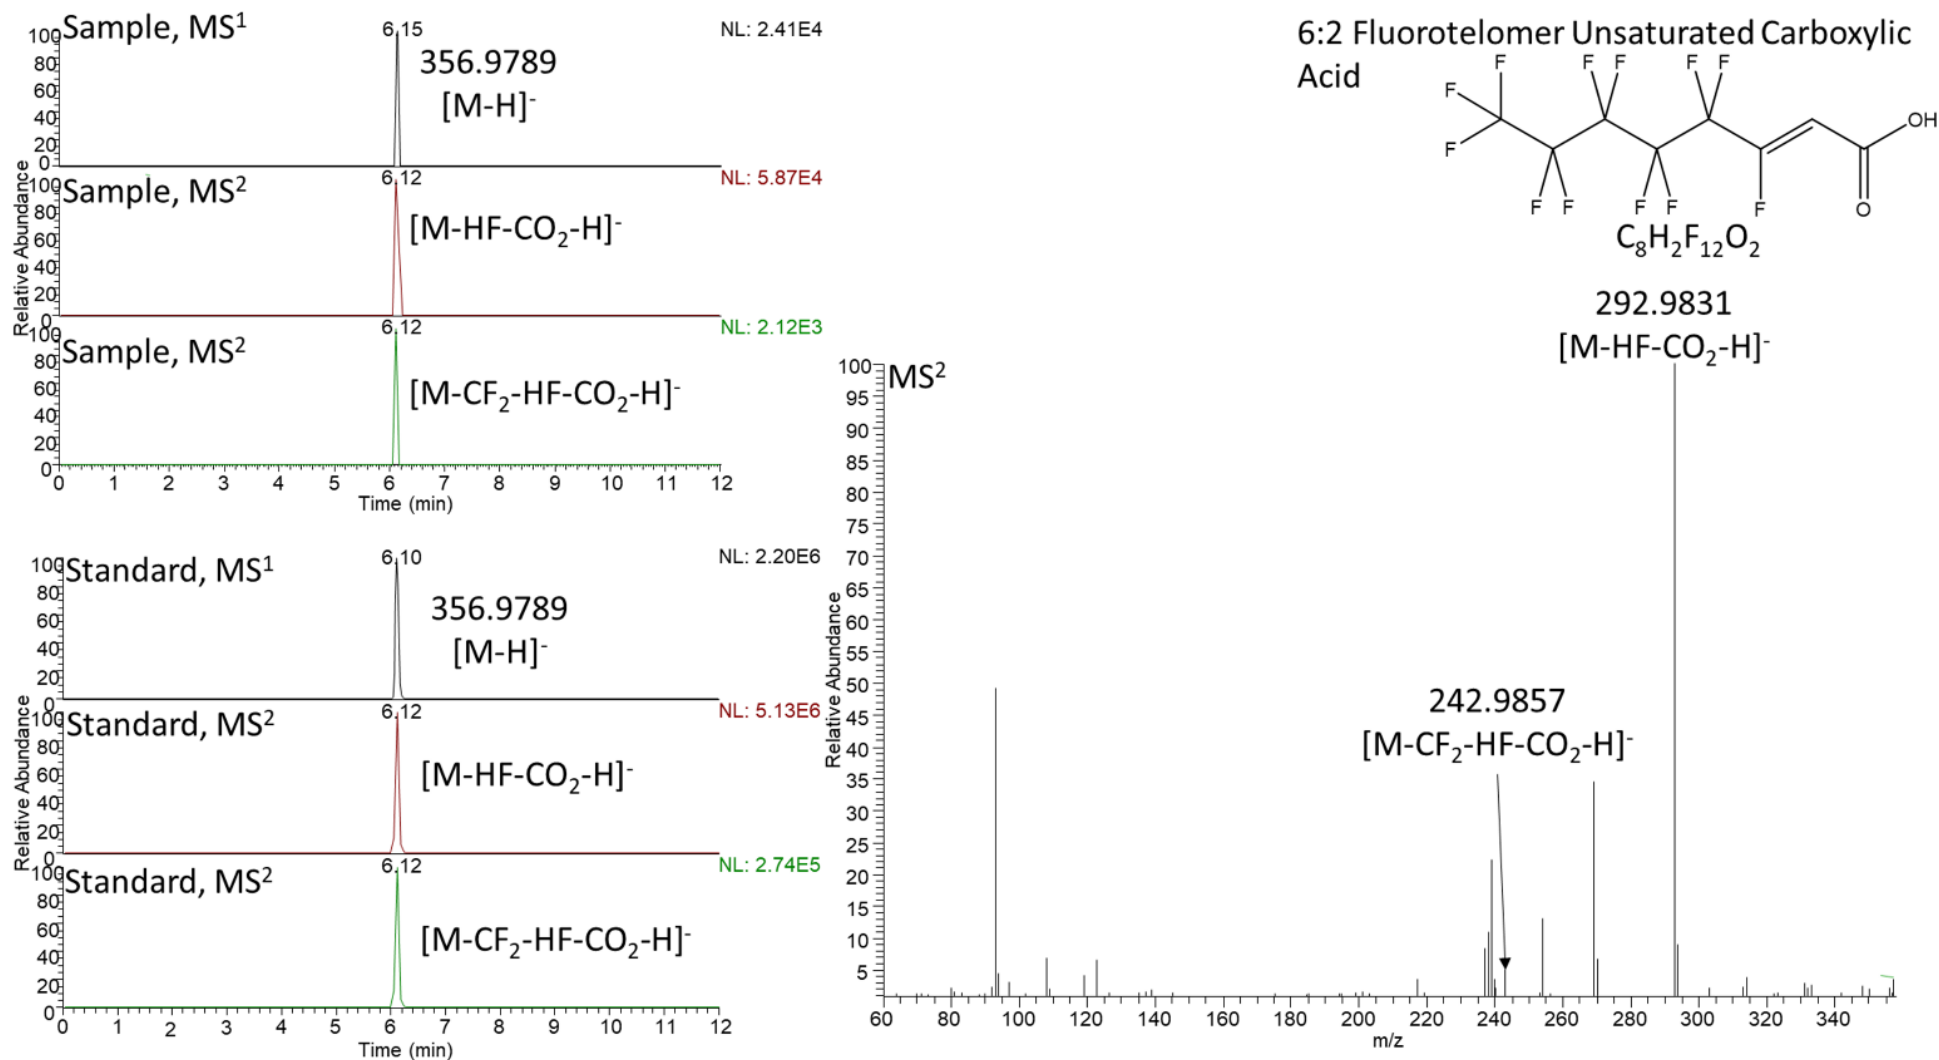

**Figure S7.** Extracted ion chromatograms and a representative mass spectrum for compound group A, 6:2 FTUCA. The MS<sup>2</sup> fragments of this compound were confirmed by comparing their chromatographic profiles with corresponding precursor ions. The fragments from this compound were compared to those from an authentic standard.

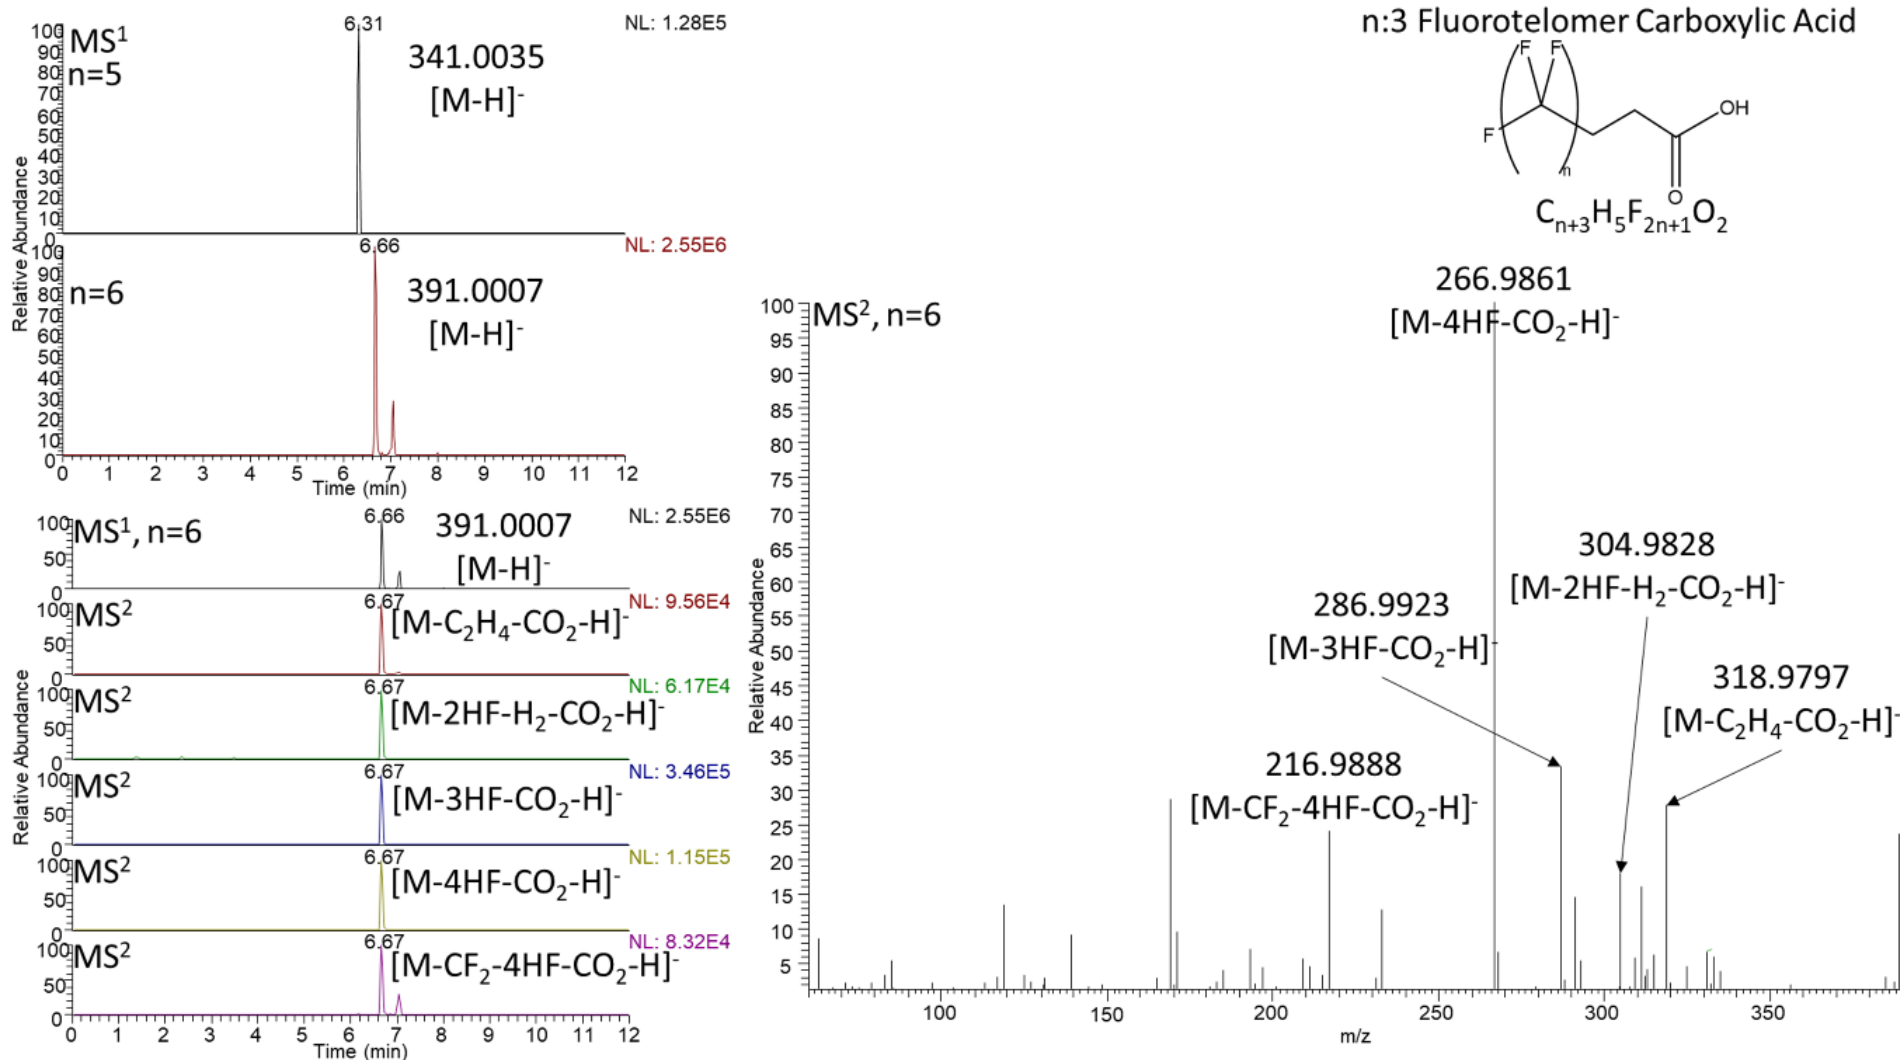

**Figure S8.** Extracted ion chromatograms and a representative mass spectrum for compound group B, n:3 fluorotelomer carboxylic acids. The fragments from this compound were compared to those reported in previous studies.<sup>9,11,13,26,27</sup>

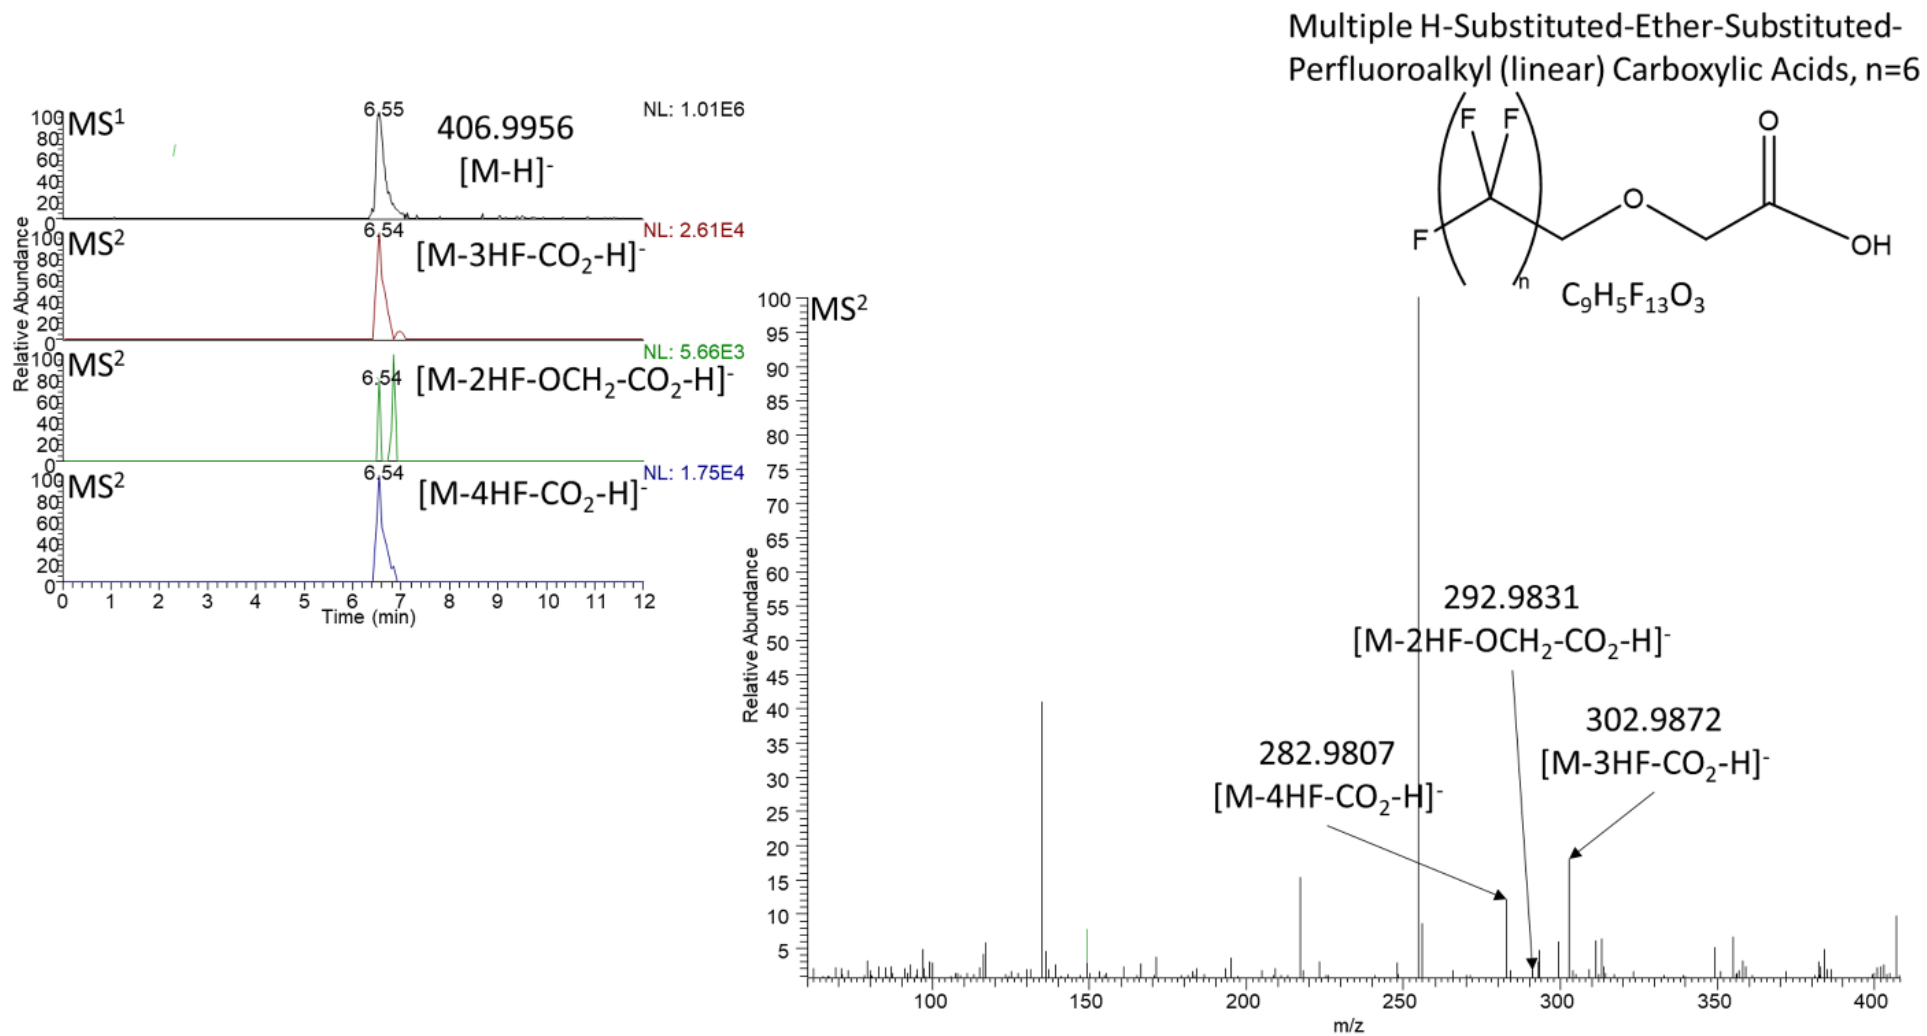

**Figure S9.** Extracted ion chromatograms and a mass spectrum for compound group C, multiple H-substituted-ether-substituted-polyfluoroalkyl (linear) carboxylic acids. The fragments from this compound were compared to those reported in previous studies.<sup>14</sup>

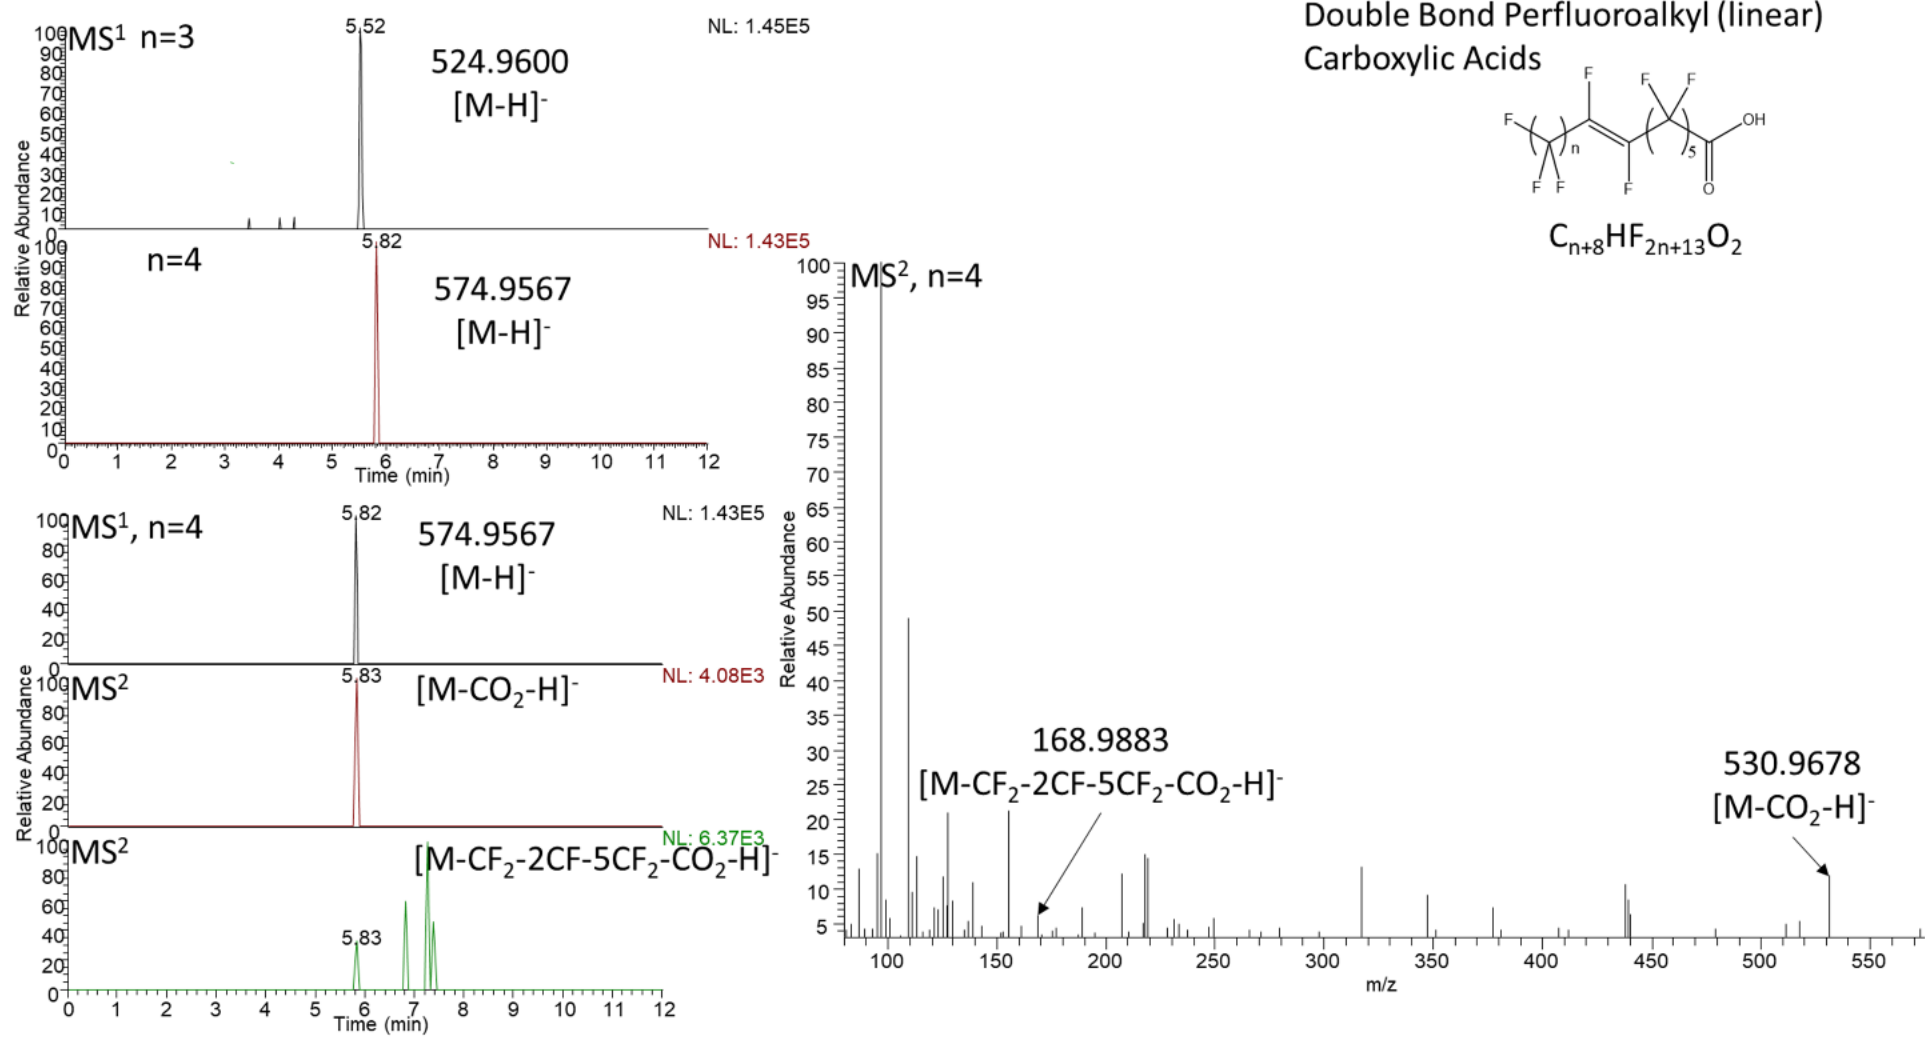

**Figure S10.** Extracted ion chromatograms and a representative mass spectrum for compound group D, double bond perfluoroalkyl (linear) carboxylic acids. The fragments from this compound were compared to those reported in previous studies.<sup>14,15</sup>



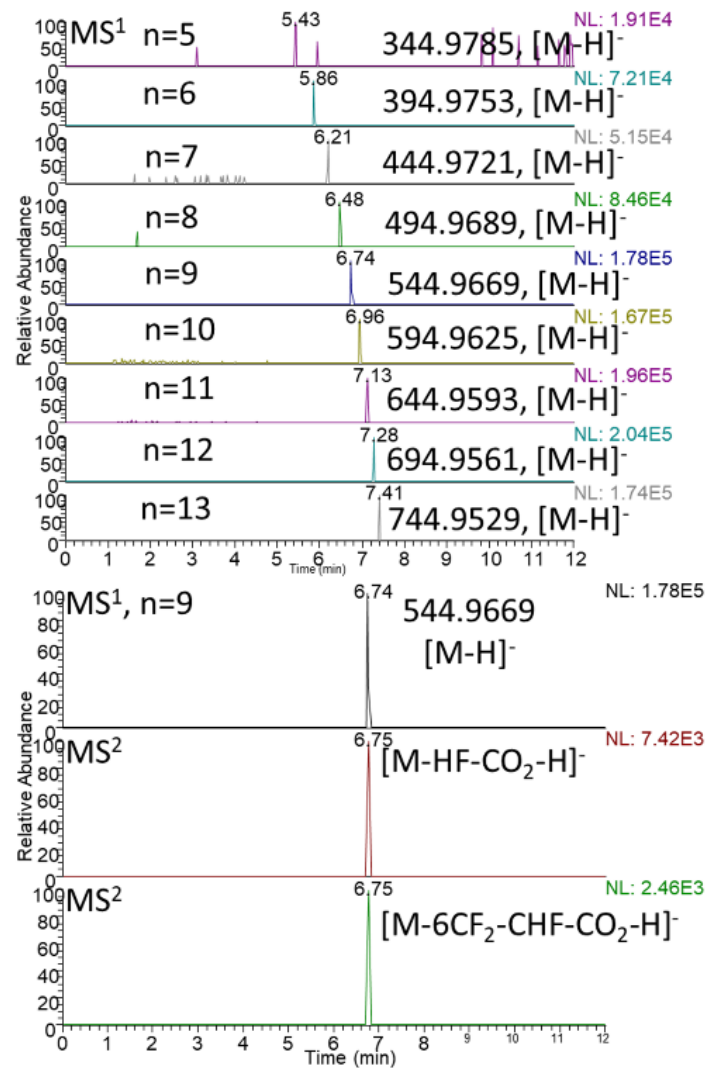

H-substituted Perfluoroalkyl (linear)  
Carboxylic Acids

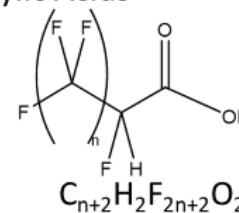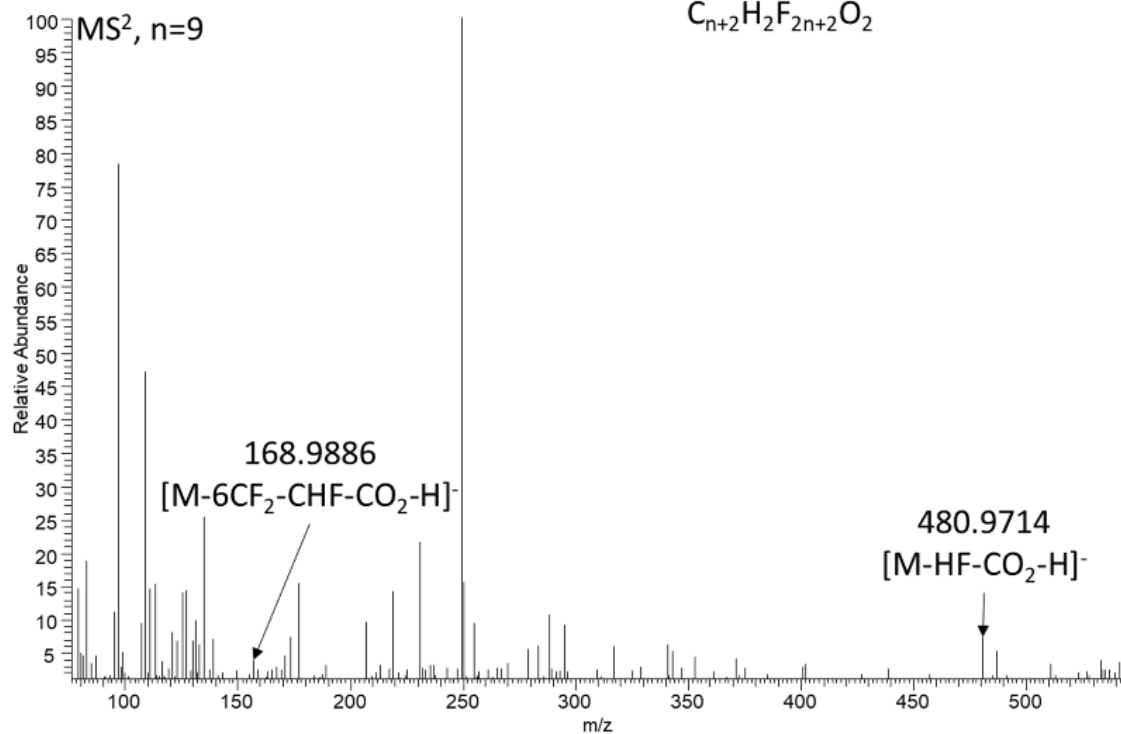

**Figure S11.** Extracted ion chromatograms and a mass spectrum for compound group E, H-substituted perfluoroalkyl (linear) carboxylic acids. The fragments from this compound were compared to those reported in previous studies.<sup>12,14,16,17</sup>

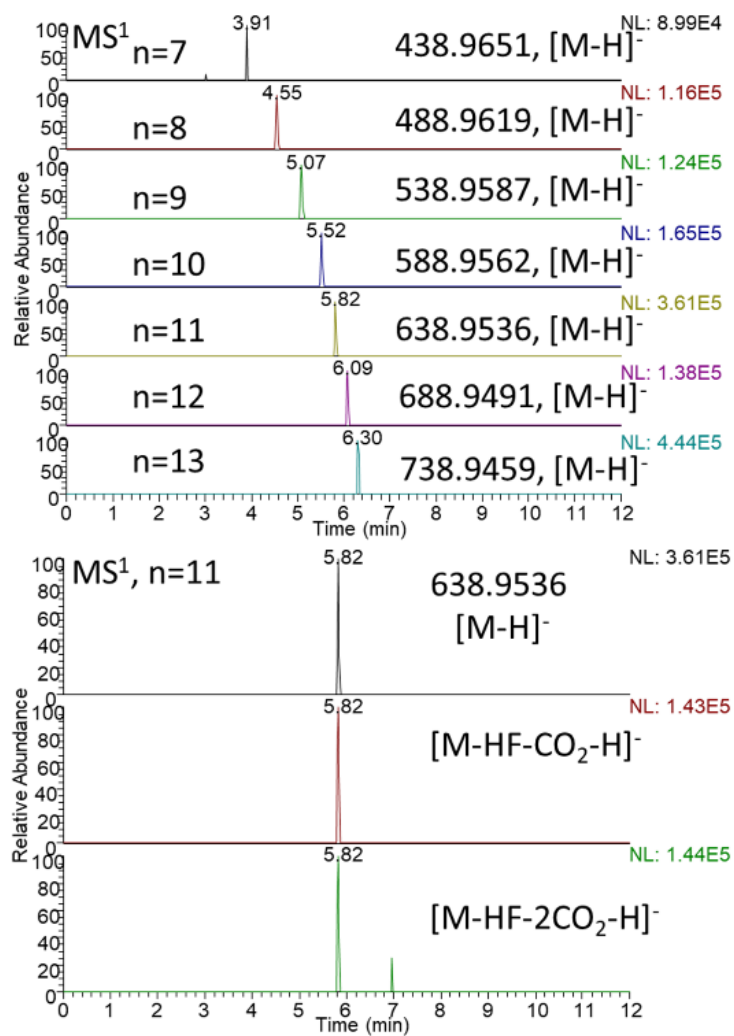

### Perfluoroalkyl (linear) Dicarboxylic Acids

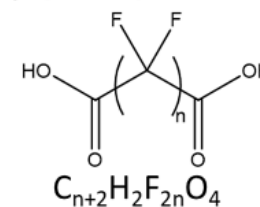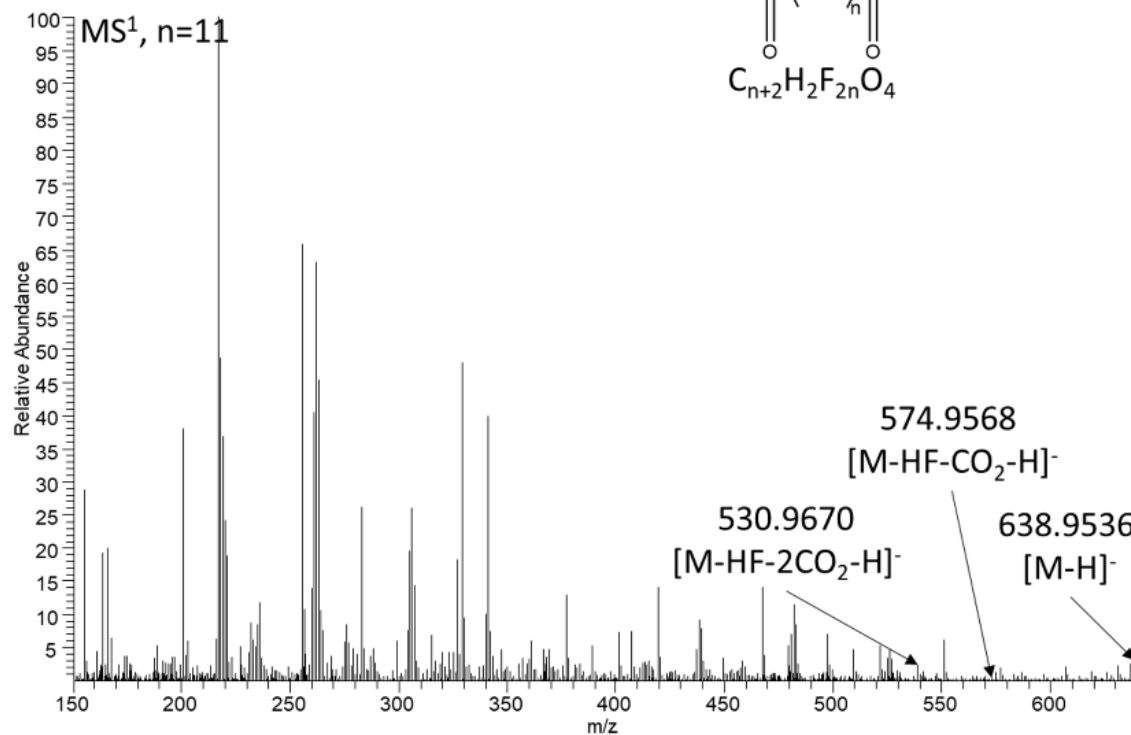

**Figure S12.** Extracted ion chromatograms and a representative mass spectrum for compound group F, perfluoroalkyl (linear) dicarboxylic acids. The fragments from this compound were compared to those reported in previous studies.<sup>14</sup>

## References

- (1) Xia, C.; Diamond, M. L.; Peaslee, G. F.; Peng, H.; Blum, A.; Wang, Z.; Shalin, A.; Whitehead, H. D.; Green, M.; Schwartz-Narbonne, H.; Yang, D.; Venier, M. Per- and Polyfluoroalkyl Substances in North American School Uniforms. *2022*, *56* (19), 13845–13857. <https://doi.org/10.1021/acs.est.2c02111>.
- (2) Wu, Y.; Romanak, K.; Bruton, T.; Blum, A.; Venier, M. Per- and Polyfluoroalkyl Substances in Paired Dust and Carpets from Childcare Centers. *Chemosphere* **2020**, *251*, 126771. <https://doi.org/10.1016/j.chemosphere.2020.126771>.
- (3) Whitehead, H. D.; Venier, M.; Wu, Y.; Eastman, E.; Urbanik, S.; Diamond, M. L.; Shalin, A.; Schwartz-Narbonne, H.; Bruton, T. A.; Blum, A.; Wang, Z.; Green, M.; Tighe, M.; Wilkinson, J. T.; McGuinness, S.; Peaslee, G. F. Fluorinated Compounds in North American Cosmetics. *Environ Sci Technol Lett* **2021**, *8* (7), 538–544. <https://doi.org/10.1021/acs.estlett.1c00240>.
- (4) Yang, D.; Han, J.; Hall, D. R.; Sun, J.; Fu, J.; Kutarna, S.; Houck, K. A.; Lalone, C. A.; Doering, J. A.; Ng, C. A.; Peng, H. Nontarget Screening of Per- And Polyfluoroalkyl Substances Binding to Human Liver Fatty Acid Binding Protein. *Environ Sci Technol* **2020**, *54* (9), 5676–5686. <https://doi.org/10.1021/acs.est.0c00049>.
- (5) Smith, C. A.; Want, E. J.; O’Maille, G.; Abagyan, R.; Siuzdak, G. XCMS: Processing Mass Spectrometry Data for Metabolite Profiling Using Nonlinear Peak Alignment, Matching, and Identification. *Anal Chem* **2006**, *78* (3), 779–787. <https://doi.org/10.1021/ac051437y>.
- (6) Liu, Y.; D’Agostino, L. A.; Qu, G.; Jiang, G.; Martin, J. W. High-Resolution Mass Spectrometry (HRMS) Methods for Nontarget Discovery and Characterization of Poly- and per-Fluoroalkyl Substances (PFASs) in Environmental and Human Samples. *TrAC - Trends in Analytical Chemistry* **2019**, *121*, 115420. <https://doi.org/10.1016/j.trac.2019.02.021>.
- (7) Schymanski, E. L.; Jeon, J.; Gulde, R.; Fenner, K.; Ruff, M.; Singer, H. P.; Hollender, J. Identifying Small Molecules via High Resolution Mass Spectrometry: Communicating Confidence. *Environ Sci Technol* **2014**, *48* (4), 2097–2098. <https://doi.org/10.1021/es5002105>.
- (8) Schultes, L.; Peaslee, G. F.; Brockman, J. D.; Majumdar, A.; McGuinness, S. R.; Wilkinson, J. T.; Sandblom, O.; Ngwenyama, R. A.; Benskin, J. P. Total Fluorine Measurements in Food Packaging: How Do Current Methods Perform? *Environ Sci Technol Lett* **2019**, *6* (2), 73–78. <https://doi.org/10.1021/acs.estlett.8b00700>.
- (9) Robel, A. E.; Marshall, K.; Dickinson, M.; Lunderberg, D.; Butt, C.; Peaslee, G.; Stapleton, H. M.; Field, J. A. Closing the Mass Balance on Fluorine on Papers and Textiles. *Environ Sci Technol* **2017**, *51* (16), 9022–9032. <https://doi.org/10.1021/acs.est.7b02080>.
- (10) Ritter, E. E.; Dickinson, M. E.; Harron, J. P.; Lunderberg, D. M.; DeYoung, P. A.; Robel, A. E.; Field, J. A.; Peaslee, G. F. PIGE as a Screening Tool for Per- and Polyfluorinated

- Substances in Papers and Textiles. *Nuclear Instruments and Methods in Physics Research B* **2017**, *407*, 47–54. <https://doi.org/10.1016/j.nimb.2017.05.052>.
- (11) Schaidler, L. A.; Balan, S. A.; Blum, A.; Andrews, D. Q.; Strynar, M. J.; Dickinson, M. E.; Lunderberg, D. M.; Lang, J. R.; Peaslee, G. F. Fluorinated Compounds in U.S. Fast Food Packaging. *Environ Sci Technol Lett* **2017**, *4*, 105–111. <https://doi.org/10.1021/acs.estlett.6b00435>.
- (12) Jacob, P.; Barzen-hanson, K. A.; Helbling, D. E. Target and Nontarget Analysis of Per- and Polyfluoroalkyl Substances in Wastewater from Electronics Fabrication Facilities. *Environ Sci Technol* **2021**, *4* (55), 2346–2356. <https://doi.org/10.1021/acs.est.0c06690>.
- (13) Barrett, H.; Du, X.; Houde, M.; Lair, S.; Verreault, J.; Peng, H. Suspect and Nontarget Screening Revealed Class-Specific Temporal Trends (2000-2017) of Poly- and Perfluoroalkyl Substances in St. Lawrence Beluga Whales. *Environ Sci Technol* **2021**, *55* (3), 1659–1671. <https://doi.org/10.1021/acs.est.0c05957>.
- (14) Wang, Y.; Yu, N.; Zhu, X.; Guo, H.; Jiang, J.; Wang, X.; Shi, W.; Wu, J.; Yu, H.; Wei, S. Suspect and Nontarget Screening of Per- and Polyfluoroalkyl Substances in Wastewater from a Fluorochemical Manufacturing Park. *Environ Sci Technol* **2018**, *52* (19), 11007–11016. <https://doi.org/10.1021/acs.est.8b03030>.
- (15) Washington, J. W.; Jenkins, T. M.; Weber, E. J. Identification of Unsaturated and 2H Polyfluorocarboxylate Homologous Series and Their Detection in Environmental Samples and as Polymer Degradation Products. *Environ Sci Technol* **2015**, *49* (22), 13256–13263. <https://doi.org/10.1021/acs.est.5b03379>.
- (16) Wang, X.; Yu, N.; Qian, Y.; Shi, W.; Zhang, X.; Geng, J.; Yu, H.; Wei, S. Non-Target and Suspect Screening of per- and Polyfluoroalkyl Substances in Chinese Municipal Wastewater Treatment Plants. *Water Res* **2020**, *183*, 115989. <https://doi.org/10.1016/j.watres.2020.115989>.
- (17) Liu, Y.; Pereira, A. D. S.; Martin, J. W. Discovery of C5-C17 Poly- and Perfluoroalkyl Substances in Water by in-Line Spe-HPLC-Orbitrap with in-Source Fragmentation Flagging. *Anal Chem* **2015**, *87* (8), 4260–4268. <https://doi.org/10.1021/acs.analchem.5b00039>.
- (18) *Information Requirements For Food Packaging Submissions*. December 30, 2020. <https://www.canada.ca/en/health-canada/services/food-nutrition/legislation-guidelines/guidance-documents/information-requirements-food-packaging-submissions.html> (accessed 2021-08-28).
- (19) Schrenk, D.; Bignami, M.; Bodin, L.; Chipman, J. K.; del Mazo, J.; Grasl-Kraupp, B.; Hogstrand, C.; Hoogenboom, L.; Leblanc, J. C.; Nebbia, C. S.; Nielsen, E.; Ntzani, E.; Petersen, A.; Sand, S.; Vleminckx, C.; Wallace, H.; Barregård, L.; Ceccatelli, S.; Cravedi, J. P.; Halldorsson, T. I.; Haug, L. S.; Johansson, N.; Knutsen, H. K.; Rose, M.; Roudot, A. C.; van Loveren, H.; Vollmer, G.; Mackay, K.; Riolo, F.; Schwerdtle, T. Risk to Human Health Related to the Presence of Perfluoroalkyl Substances in Food. *EFSA Journal* **2020**, *18* (9). <https://doi.org/10.2903/j.efsa.2020.6223>.

- (20) Rice, P. A.; Aungst, J.; Cooper, J.; Bandele, O.; Kabadi, S. v. Comparative Analysis of the Toxicological Databases for 6:2 Fluorotelomer Alcohol (6:2 FTOH) and Perfluorohexanoic Acid (PFHxA). *Food and Chemical Toxicology* **2020**, *138* (February), 111210. <https://doi.org/10.1016/j.fct.2020.111210>.
- (21) Rand, A. A.; Rooney, J. P.; Butt, C. M.; Meyer, J. N.; Mabury, S. A. Cellular Toxicity Associated with Exposure to Perfluorinated Carboxylates (PFCAs) and Their Metabolic Precursors. *Chem Res Toxicol* **2014**, *27* (1), 42–50. <https://doi.org/10.1021/tx400317p>.
- (22) Kabadi, S. v.; Fisher, J.; Aungst, J.; Rice, P. Internal Exposure-Based Pharmacokinetic Evaluation of Potential for Biopersistence of 6:2 Fluorotelomer Alcohol (FTOH) and Its Metabolites. *Food and Chemical Toxicology* **2018**, *112* (October 2017), 375–382. <https://doi.org/10.1016/j.fct.2018.01.012>.
- (23) Bokkers, B. G. H.; van de Ven, B.; Janssen, P.; Bil, W.; van Broekhuizen, F.; Zeilmaier, M. J.; Oomen, A. G. *Per- and Polyfluoroalkyl Substances (PFASs) in Food Contact Materials*; Bilthoven, 2018; Vol. 2018–0181. <https://doi.org/10.21945/RIVM-2018-0181>.
- (24) Yuan, G.; Peng, H.; Huang, C.; Hu, J. Ubiquitous Occurrence of Fluorotelomer Alcohols in Eco-Friendly Paper-Made Food-Contact Materials and Their Implication for Human Exposure. *Environ Sci Technol* **2016**, *50* (2), 942–950. <https://doi.org/10.1021/acs.est.5b03806>.
- (25) Xu, Y.; Noonan, G. O.; Begley, T. H. Migration of Perfluoroalkyl Acids from Food Packaging to Food Simulants. *Food Addit Contam Part A Chem Anal Control Expo Risk Assess* **2013**, *30* (5), 899–908. <https://doi.org/10.1080/19440049.2013.789556>.
- (26) Zabaleta, I.; Negreira, N.; Bizkarguenaga, E.; Prieto, A.; Covaci, A.; Zuloaga, O. Screening and Identification of Per- and Polyfluoroalkyl Substances in Microwave Popcorn Bags. *Food Chem* **2017**, *230*, 497–506. <https://doi.org/10.1016/j.foodchem.2017.03.074>.
- (27) Zabaleta, I.; Bizkarguenaga, E.; Bilbao, D.; Etxebarria, N.; Prieto, A.; Zuloaga, O. Fast and Simple Determination of Perfluorinated Compounds and Their Potential Precursors in Different Packaging Materials. *Talanta* **2016**, *152*, 353–363. <https://doi.org/10.1016/j.talanta.2016.02.022>.
